# Supplementary material for: Antitumor Activity of Quinazolinone Alkaloids Inspired by Marine Natural Products
Source: PubMed Central journal article supplement (PMC6117665; doi:10.3390/md16080261), 2018-07-31
Supplement: marinedrugs-16-00261-s001.pdf [file marinedrugs-16-00261-s001.pdf]

# Antitumor activity of quinazolinone alkaloids inspired by marine natural products

Solida Long <sup>1</sup>, Diana I. S. P. Resende <sup>1,2</sup>, Anake Kijjoa <sup>2,3</sup>, Artur M. S. Silva <sup>4</sup>, André Pina <sup>5,6,7</sup>, Tamara Fernández-Marcelo <sup>5,6</sup>, M. Helena Vasconcelos <sup>5,6,8</sup>, Emília Sousa <sup>1,2,\*</sup>, and Madalena M. M. Pinto <sup>1,2</sup>

<sup>1</sup> Laboratório de Química Orgânica e Farmacêutica, Departamento de Ciências Químicas, Faculdade de Farmácia, Universidade do Porto, Rua de Jorge Viterbo Ferreira, 228, 4050-313 Porto, Portugal. E-mail: [up201502099@ff.up.pt](mailto:up201502099@ff.up.pt) (S.L.), [madalena@ff.up.pt](mailto:madalena@ff.up.pt) (M.M.M.P.).

<sup>2</sup> Interdisciplinary Centre of Marine and Environmental Research (CIIMAR), Terminal de Cruzeiros do Porto de Lexões, Av. General Norton de Matos s/n, 4450-208, Matosinhos, Portugal. E-mail: [dresende@ff.up.pt](mailto:dresende@ff.up.pt).

<sup>3</sup> ICBAS - Instituto de Ciências Biomédicas Abel Salazar, Universidade do Porto, Rua de Jorge Viterbo Ferreira, 228, 4050-313 Porto, Portugal. E-mail: [ankijjoa@icbas.up.pt](mailto:ankijjoa@icbas.up.pt).

<sup>4</sup> QOPNA, Department of Chemistry, University of Aveiro, 3810-193 Aveiro, Portugal. E-mail: [artur.silva@ua.pt](mailto:artur.silva@ua.pt) (A.S.)

<sup>5</sup> i3S - Instituto de Investigação e Inovação em Saúde, Universidade do Porto, Portugal. E-mail: [andre.fig.pina@gmail.com](mailto:andre.fig.pina@gmail.com) (A.P.), [tmarcelo@ipatimup.pt](mailto:tmarcelo@ipatimup.pt) (T.M.), [hvasconcelos@ipatimup.pt](mailto:hvasconcelos@ipatimup.pt) (H.V.)

<sup>6</sup> Cancer Drug Resistance Group, IPATIMUP - Institute of Molecular Pathology and Immunology of the University of Porto, Portugal;

<sup>7</sup> FCUP - Faculty of Sciences of the University of Porto, Portugal;

<sup>8</sup> Laboratório de Microbiologia, Departamento de Ciências Biológicas, Faculdade de Farmácia, Universidade do Porto, Portugal.

\* Correspondence: [esousa@ff.up.pt](mailto:esousa@ff.up.pt); Tel.: +351-2-2042-8689

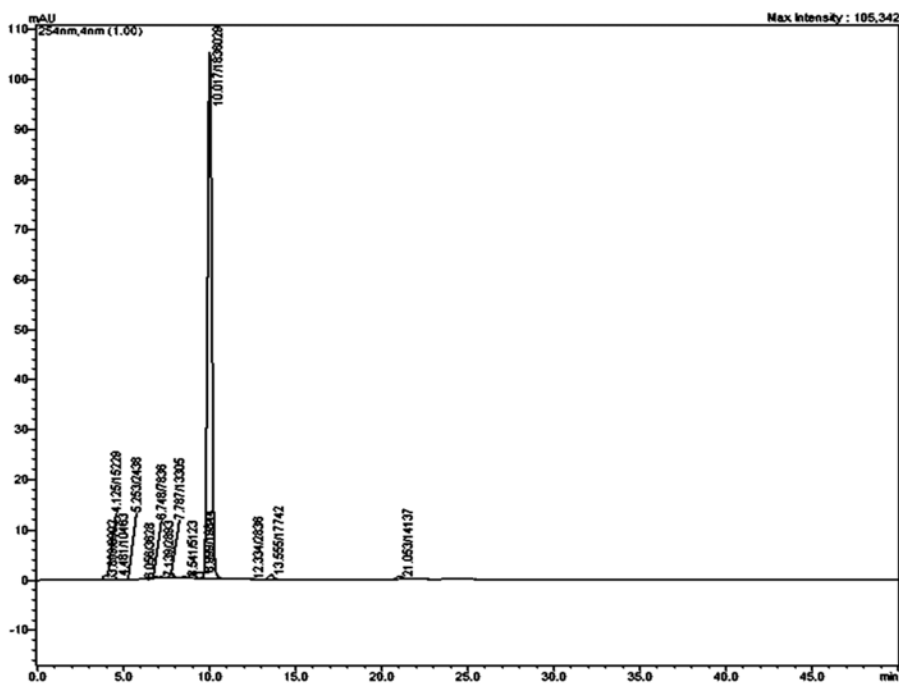

**Figure S1.** Peak purity analysis of compound 4a using RP-HPLC with diode array detector (DAD), C18 column (Kimetex®, 2.6 EV0 C18 100 Å, 150 × 4.6 mm); mobile phase: methanol: water (60:40); flowrate: 1 mL/min.

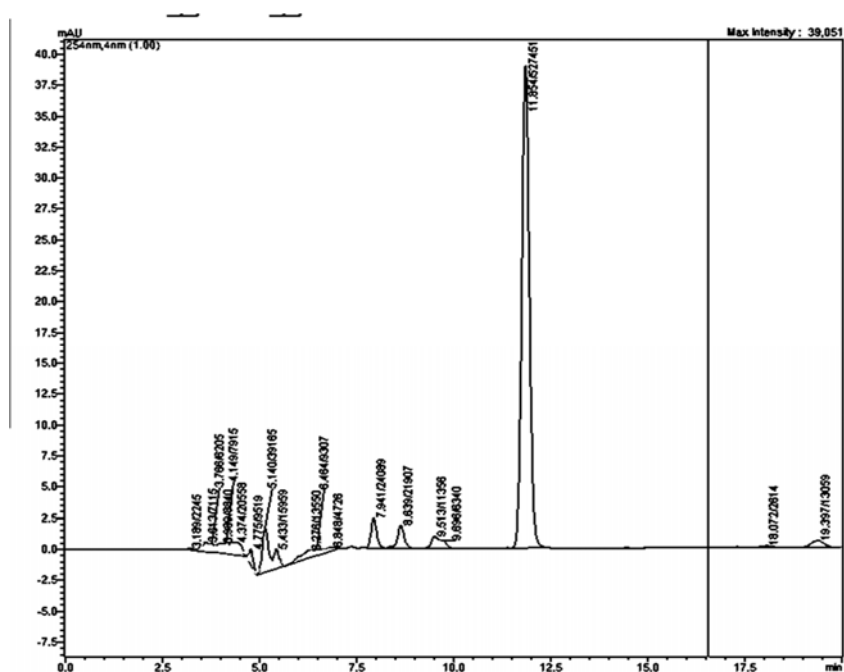

**Figure S2.** Peak purity analysis of compound 4b using RP-HPLC with diode array detector (DAD), C18 column (Kimetex®, 2.6 EV0 C18 100 Å, 150 × 4.6 mm); mobile phase: methanol: water (60:40); flowrate: 0.5 mL/min.

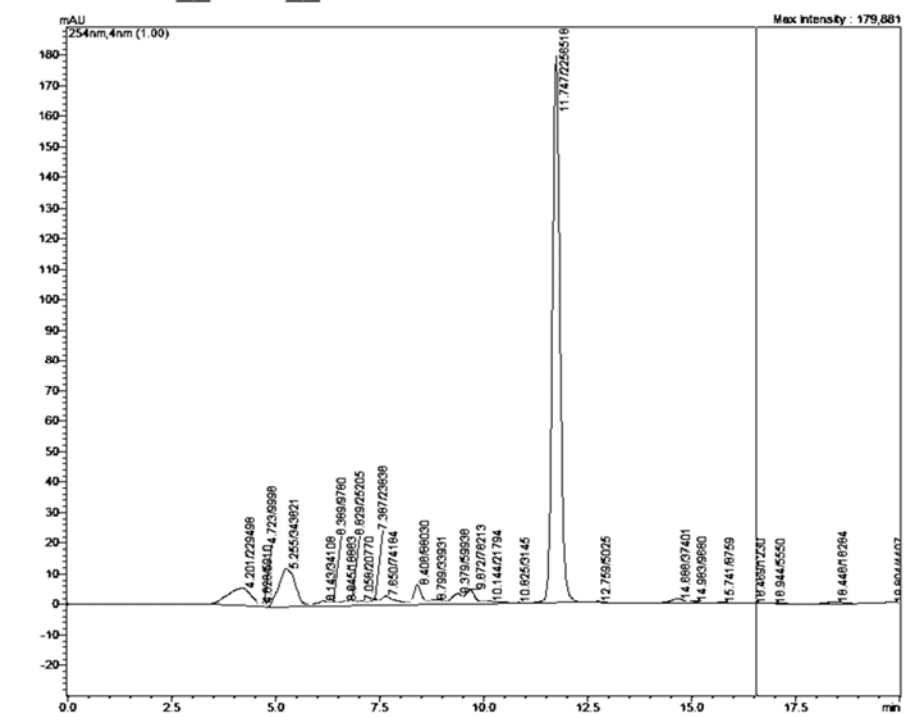

**Figure S3.** Peak purity analysis of compound 4c using RP-HPLC with diode array detector (DAD), C18 column (Kimetex®, 2.6 EV0 C18 100 Å, 150 × 4.6 mm); mobile phase: methanol: water (60:40); flowrate: 0.5 mL/min.

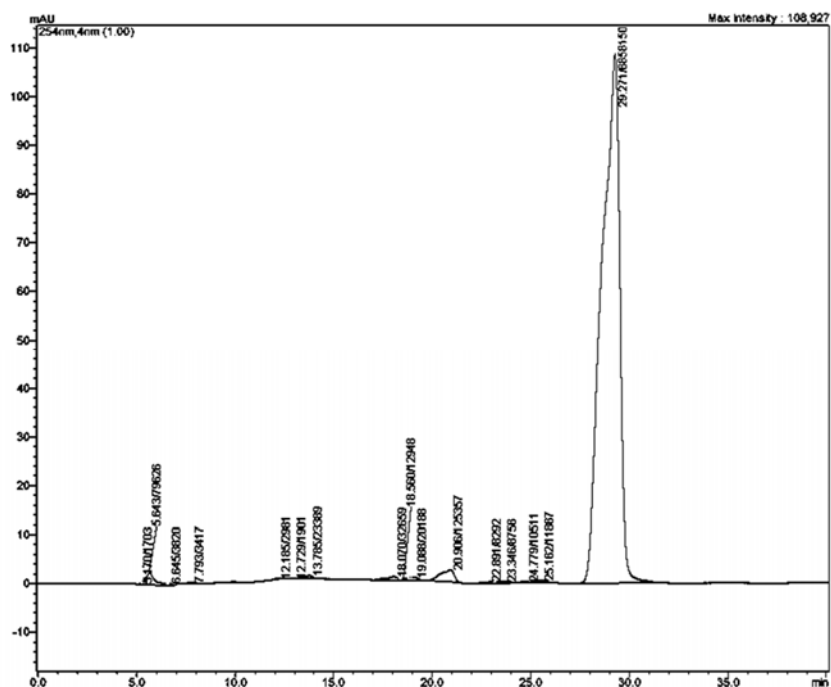

**Figure S4.** Peak purity analysis of compound 4d using RP-HPLC with diode array detector (DAD), C18 column (Kimetex®, 2.6 EV0 C18 100 Å, 150 × 4.6 mm); mobile phase: methanol: water (60:40); flowrate: 0.5 mL/min.

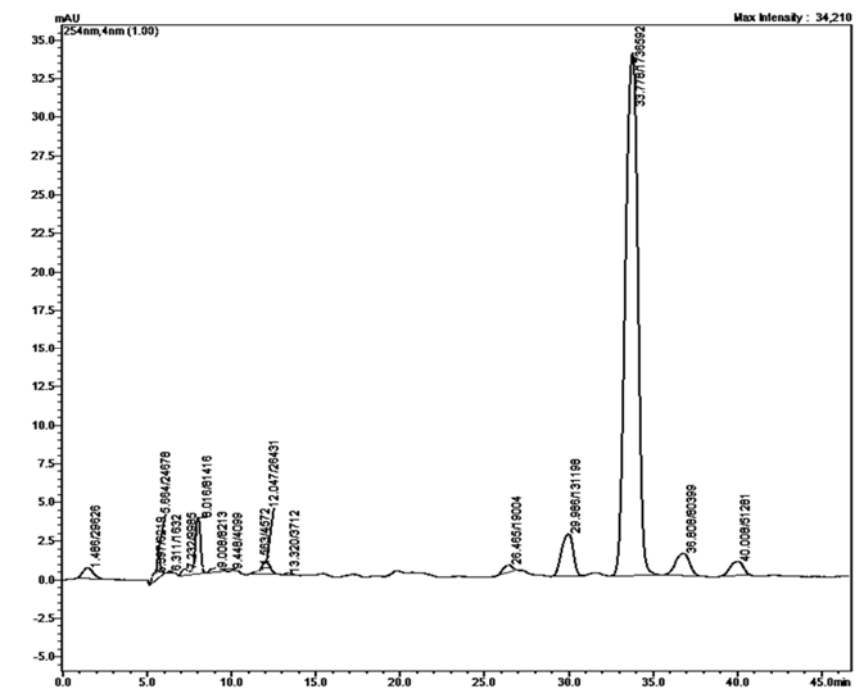

**Figure S5.** Peak purity analysis of compound **5a** using RP-HPLC with diode array detector (DAD), C18 column (Kimetex®, 2.6 EV0 C18 100 Å, 150 × 4.6 mm); mobile phase: methanol: water (60:40); flowrate: 0.5mL/min.

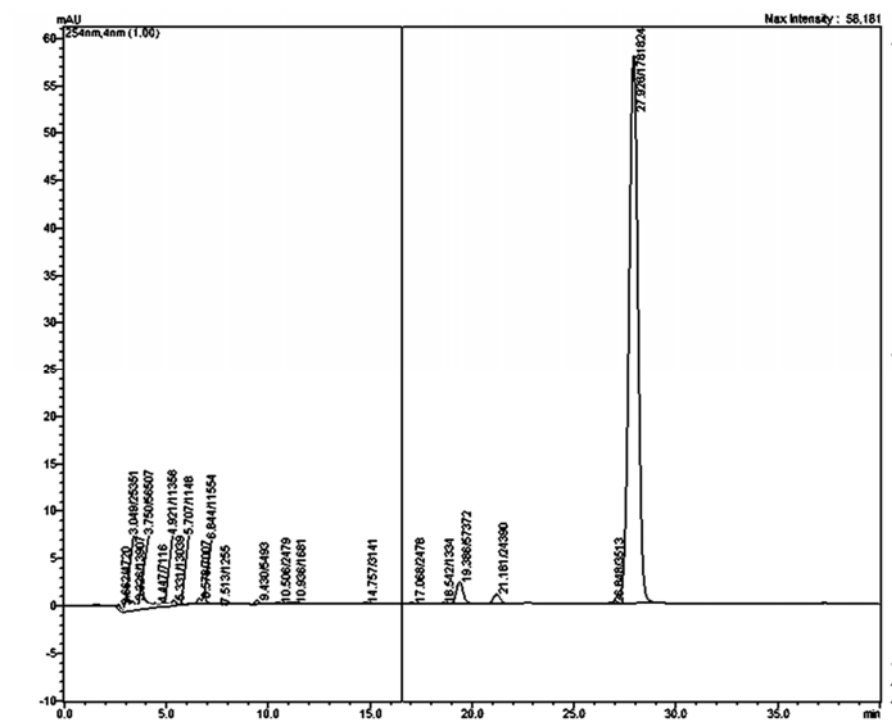

**Figure S6.** Peak purity analysis of compound **5b** using RP-HPLC with diode array detector (DAD), C18 column (Kimetex®, 2.6 EV0 C18 100 Å, 150 × 4.6 mm); mobile phase: methanol: water (60:40); flowrate: 0.5 mL/min.

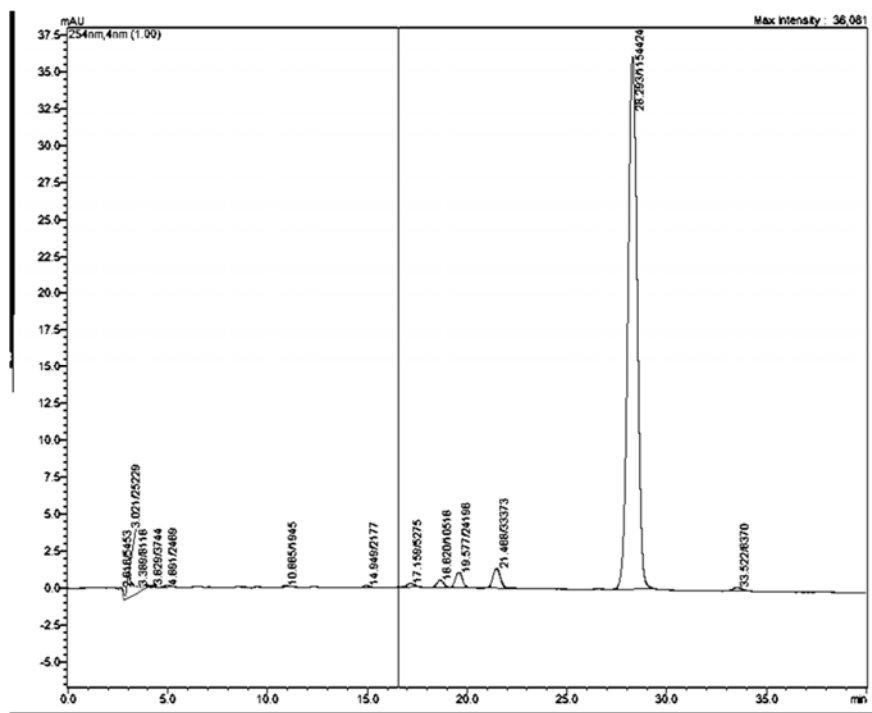

**Figure S7.** Peak purity analysis of compound 5c using RP-HPLC with diode array detector (DAD), C18 column (Kimetex®, 2.6 EV0 C18 100 Å, 150 × 4.6 mm); mobile phase: methanol: water (60:40); flowrate: 0.5 mL/min.

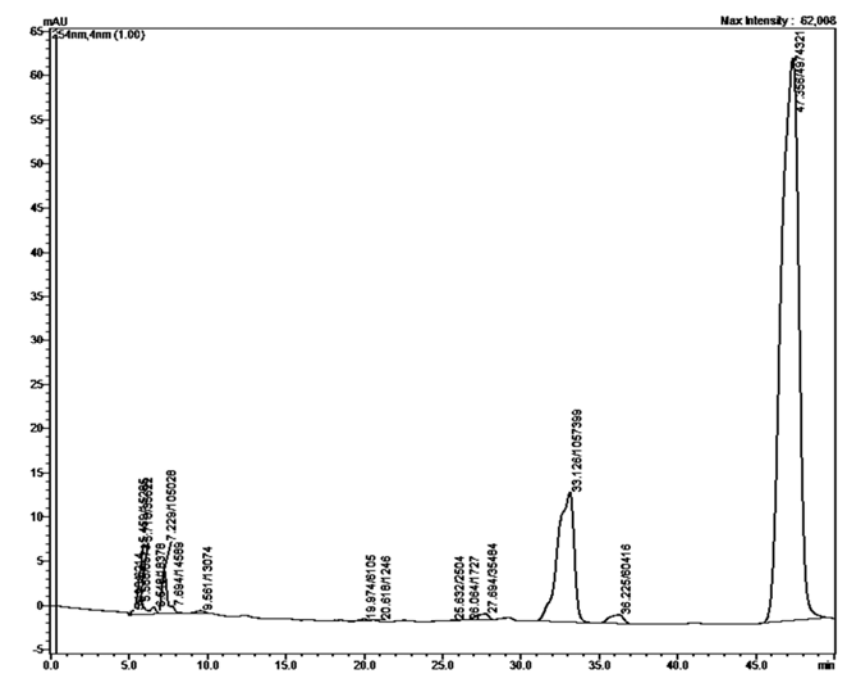

**Figure S8.** Peak purity analysis of compound **5d** using RP-HPLC with diode array detector (DAD), C18 column (Kimetex®, 2.6 EV0 C18 100 Å, 150 × 4.6 mm); mobile phase: methanol: water (60:40); flowrate: 0.5 mL/min.

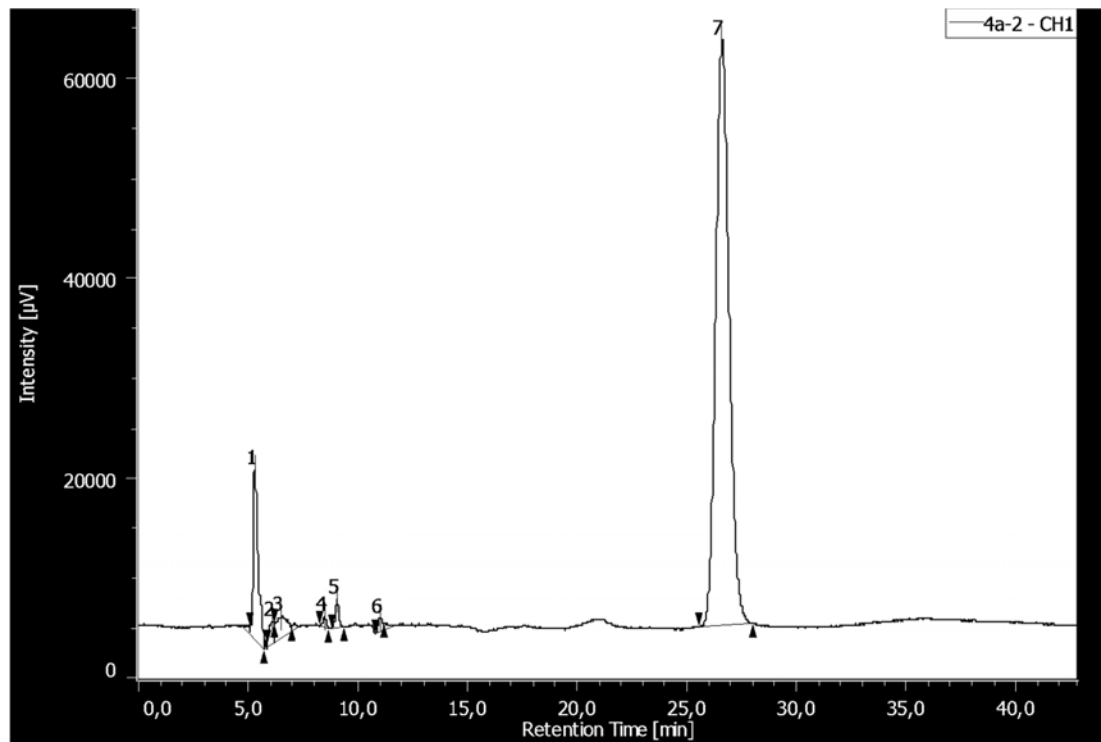

**Figure S9.** Chiral analysis of (1*S*,4*S*)-4-(1*H*-indol-3-ylmethyl)-1-isopropyl-2*H*-pyrazino[2,1-*b*]quinazolin-3,6-(1*H*, 4*H*)-dione (**4a**). Column: Lux® 5 µm Amylose-1, 250 × 4.6 mm; UV-detection: 254 nm; mobile phase: hexane:ethanol (80:20); flow rate: 0.5 mL/min.

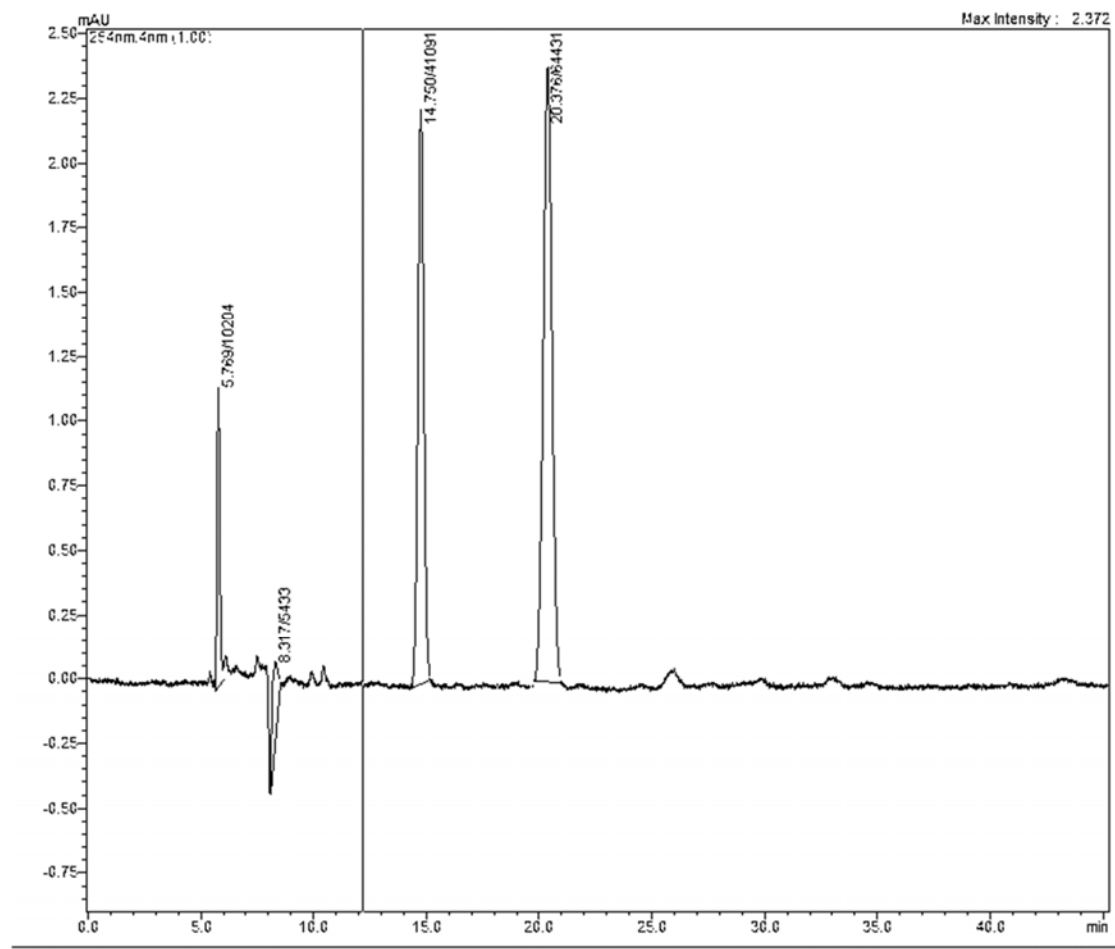

**Figure S10.** Chiral analysis of (1*S*,4*R*)-4-(1*H*-indol-3-ylmethyl)-1-isopropyl-2*H*-pyrazino[2,1-*b*]quinazolin-3,6-(1*H*, 4*H*)-dione (**4b**). Column: Lux® 5  $\mu$ m Amylose-1, 250  $\times$  4.6 mm; UV-detection: 254 nm; mobile phase: hexane:ethanol (80:20); flow rate: 0.5 mL/min.

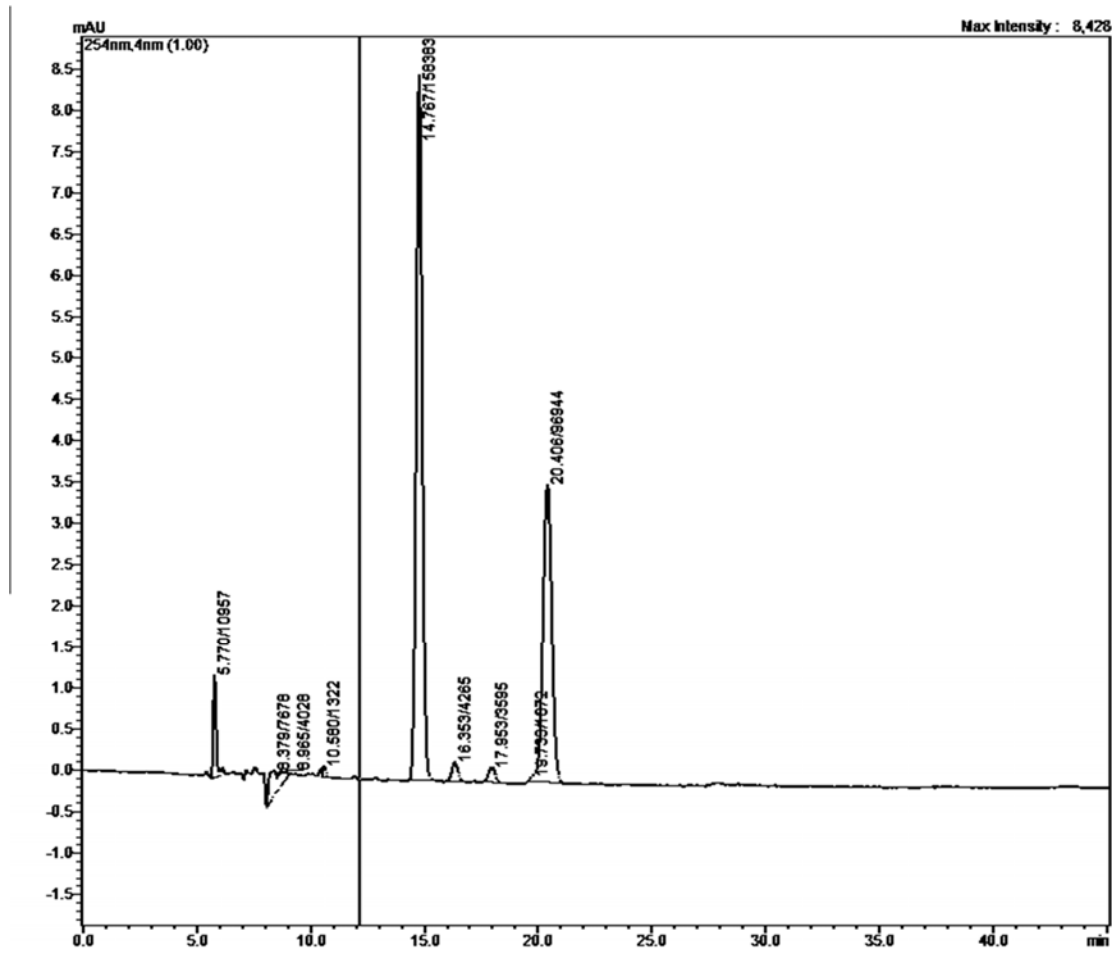

**Figure S11.** Chiral analysis of (1*R*,4*S*)-4-(1*H*-indol-3-ylmethyl)-1-isopropyl-2*H*-pyrazino[2,1-*b*]quinazolin-3,6-(1*H*, 4*H*)-dione (**4c**). Column: Lux® 5  $\mu$ m Amylose-1, 250  $\times$  4.6 mm; UV-detection: 254 nm; mobile phase: hexane:ethanol (80:20); flow rate: 0.5 mL/min.



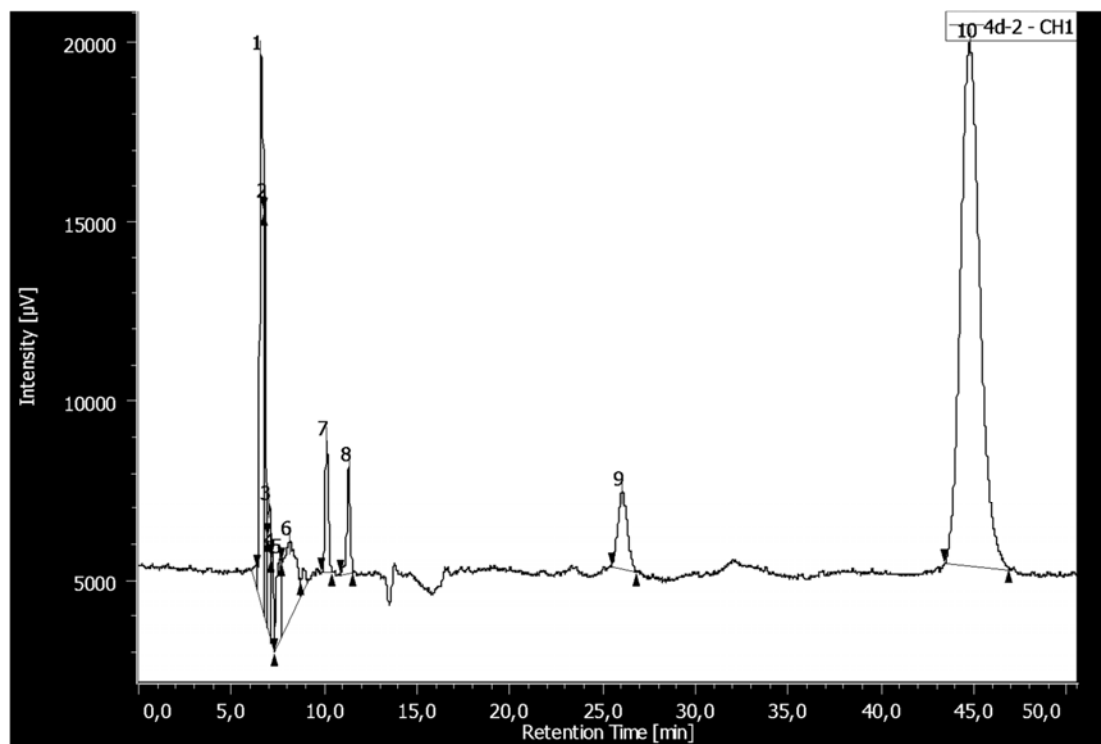

**Figure S12.** Chiral analysis of (1*R*,4*R*)-4-(1*H*-indol-3-ylmethyl)-1-isopropyl-2*H*-pyrazino[2,1-*b*]quinazolin-3,6-(1*H*, 4*H*)-dione (**4d**). Column: Lux® 5 µm Amylose-1, 250 × 4.6 mm; UV-detection: 254 nm; mobile phase: hexane:ethanol (80:20); flow rate: 0.5 mL/min.

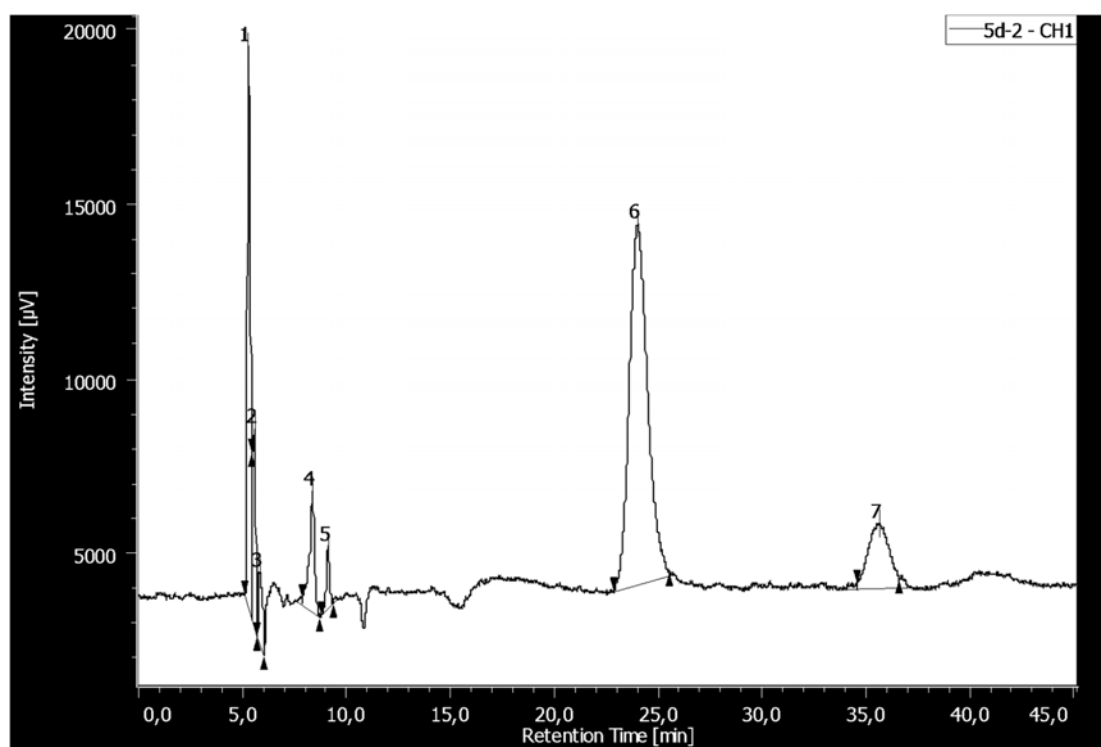

**Figure S13.** Chiral analysis of (1*S*,4*S*)-4-(1*H*-indol-3-ylmethyl)-1-isobutyl-2*H*-pyrazino[2,1-*b*]quinazolin-3,6-(1*H*, 4*H*)-dione (**5a**). Column: Lux® 5 µm Amylose-1, 250 × 4.6 mm; UV-detection: 254 nm; mobile phase: hexane:ethanol (80:20); flow rate: 0.5 mL/min.

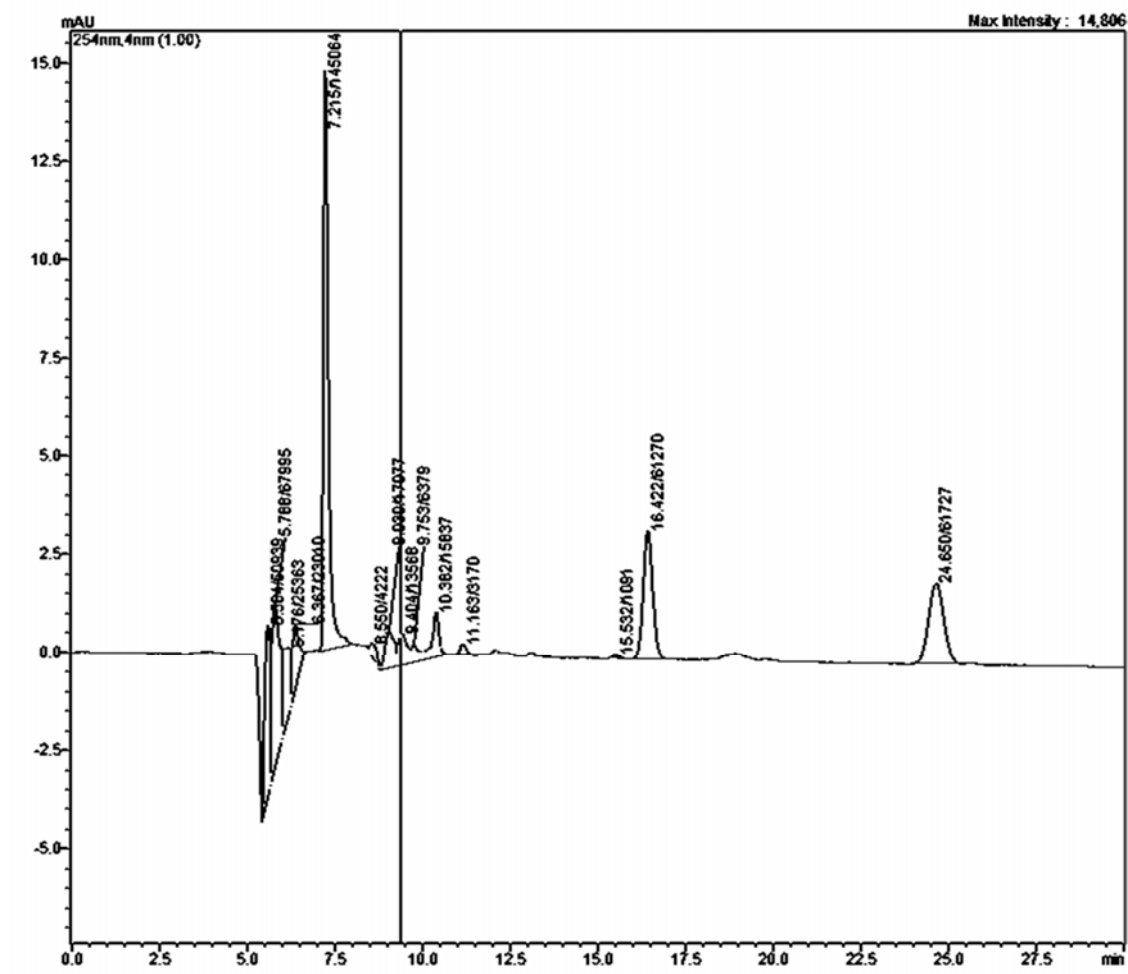

**Figure S14.** Chiral analysis of (1*S*,4*R*)-4-(1*H*-indol-3-ylmethyl)-1-isobutyl-2*H*-pyrazino[2,1-*b*]quinazolin-3,6-(1*H*, 4*H*)-dione (**5b**). Column: Lux® 5 µm Amylose-1, 250 × 4.6 mm; UV-detection: 254 nm; mobile phase: hexane:ethanol (80:20); flow rate: 0.5 mL/min.

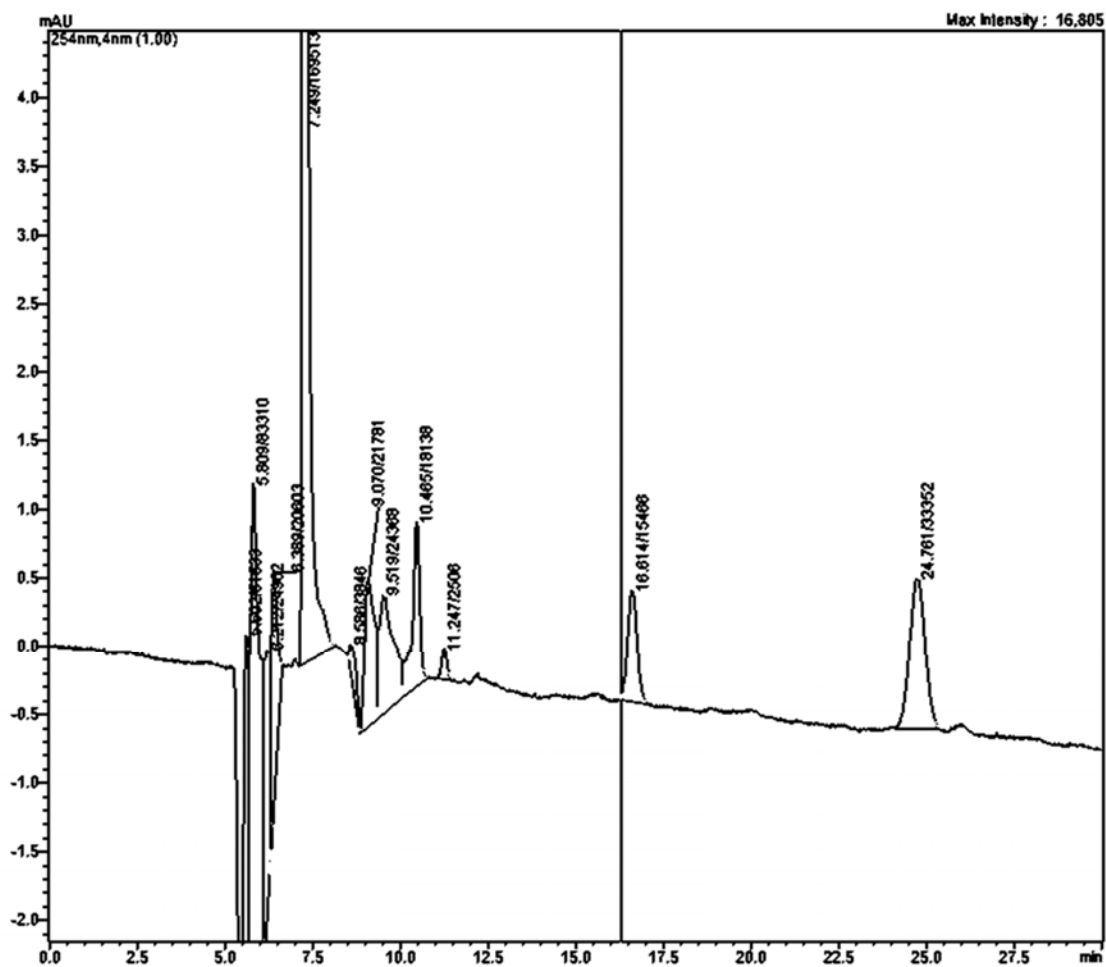

**Figure S15.** Chiral analysis of (1*R*,4*S*)-4-(1*H*-indol-3-ylmethyl)-1-isobutyl-2*H*-pyrazino[2,1-*b*]quinazolin-3,6-(1*H*, 4*H*)-dione (**5c**). Column: Lux® 5 µm Amylose-1, 250 × 4.6 mm; UV-detection: 254 nm; mobile phase: hexane:ethanol (80:20); flow rate: 0.5 mL/min.

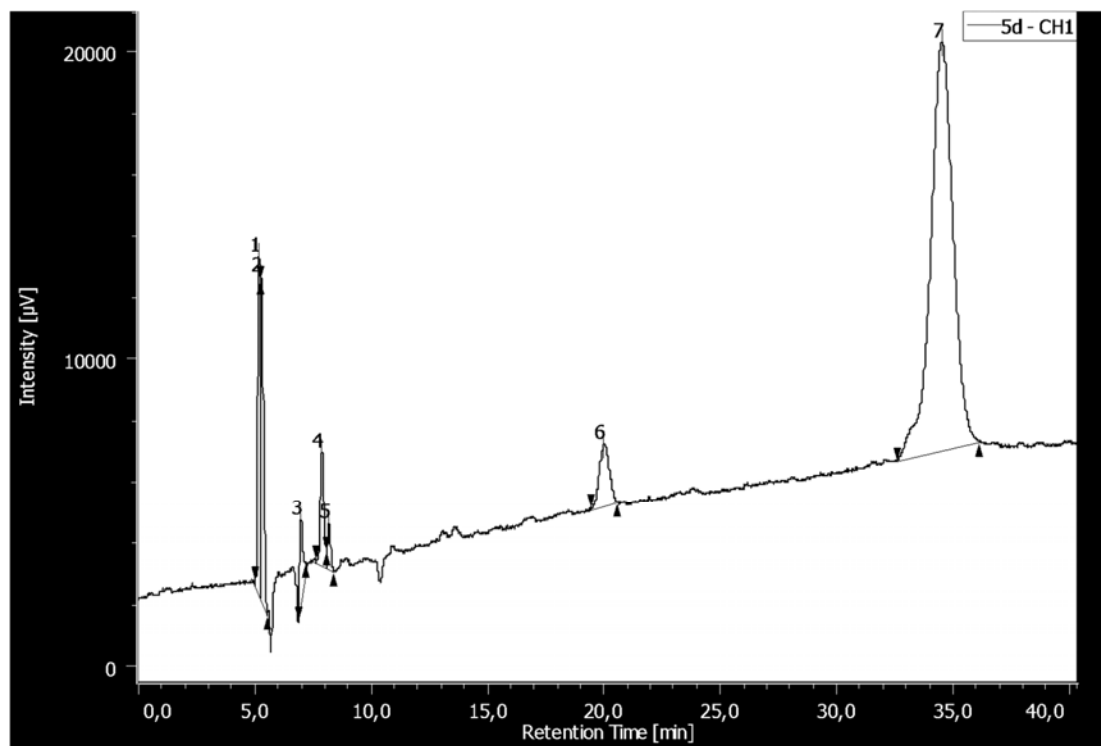

**Figure S16.** Chiral analysis of (1*R*,4*R*)-4-(1*H*-indol-3-ylmethyl)-1-isobutyl-2*H*-pyrazino[2,1-*b*]quinazolin-3,6-(1*H*, 4*H*)-dione (**5d**). Column: Lux® 5 µm Amylose-1, 250 × 4.6 mm; UV-detection: 254 nm; mobile phase: hexane:ethanol (80:20); flow rate: 0.5 mL/min.

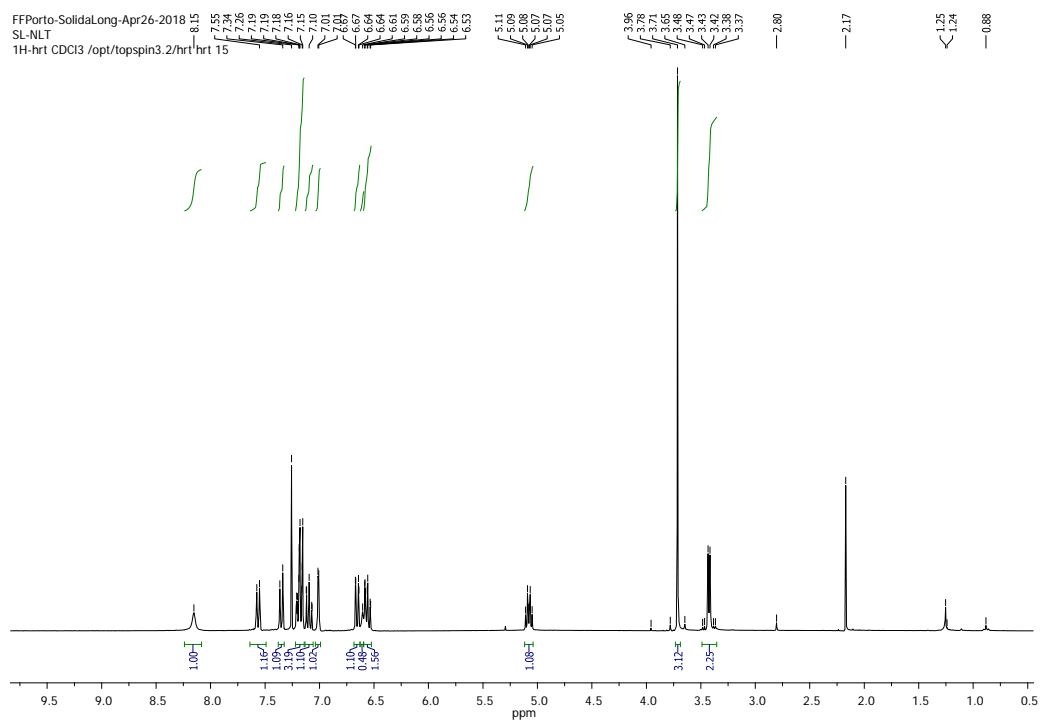

**Figure S17.**  $^1\text{H}$  NMR spectrum of *N*-(2-aminobenzoyl)-L-tryptophan methyl ester (**iv-a**) ( $\text{CDCl}_3$ , 300, MHz).

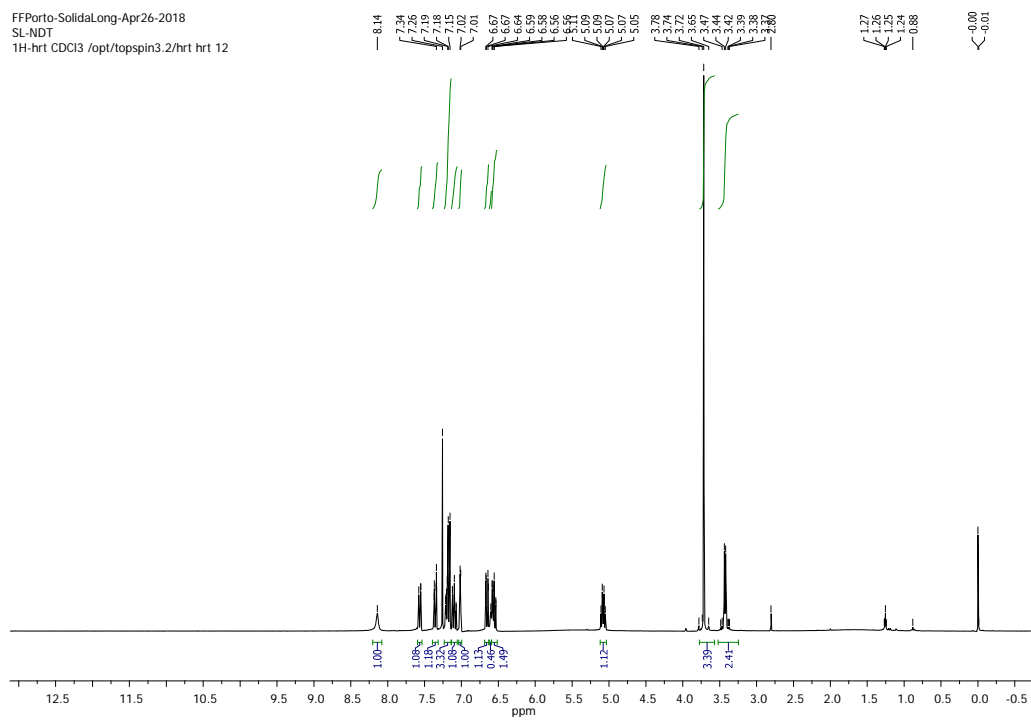

**Figure S18.**  $^1\text{H}$  NMR spectrum of *N*-(2-aminobenzoyl)-D-tryptophan methyl ester (**iv-b**) ( $\text{CDCl}_3$ , 300, MHz).

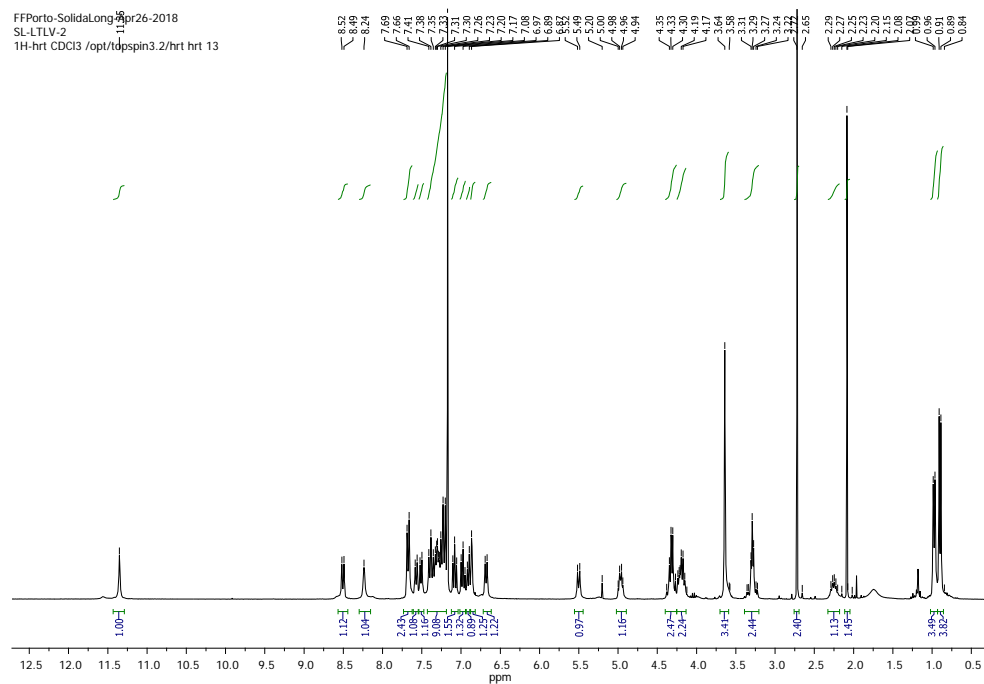

**Figure S19.**  $^1\text{H}$  NMR spectrum of *N*-[9*H*-fluoren-9-ylmethoxy)carbonyl]-*L*-valinyl-2-aminobenzoyl-*L*-tryptophan methyl ester (**vi-a**) ( $\text{CDCl}_3$ , 300, MHz).

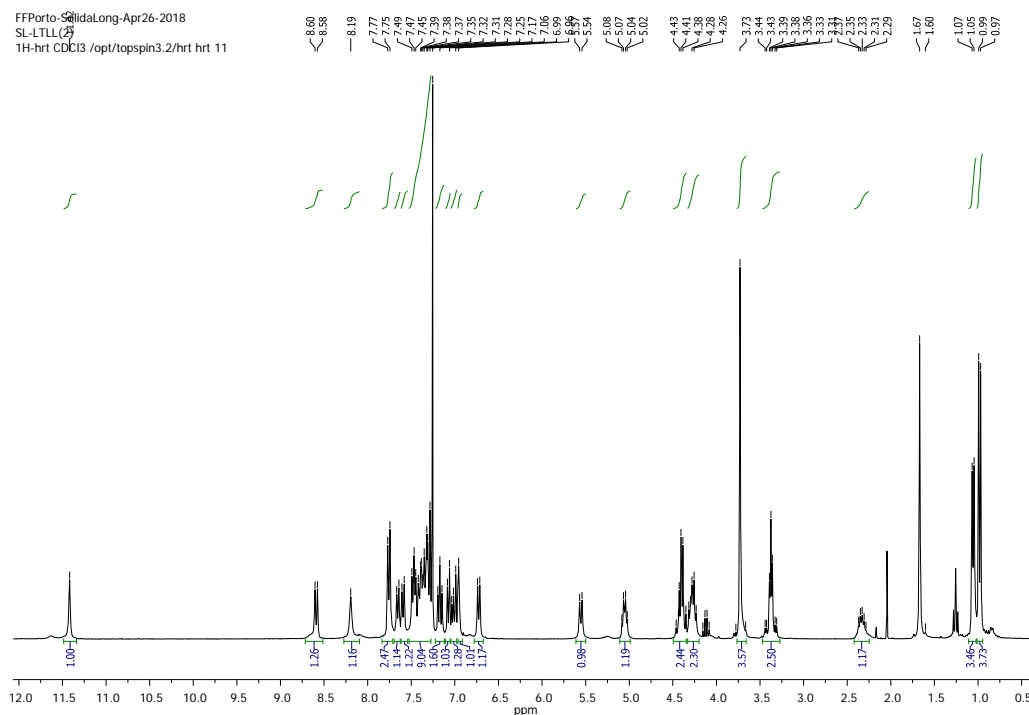

**Figure S20.**  $^1\text{H}$  NMR spectrum of *N*-[9*H*-fluoren-9-ylmethoxy)carbonyl]-*L*-methylpentanyl-2*H*-aminobenzoyl-*L*-tryptophan methyl ester (**vi-b**) ( $\text{CDCl}_3$ , 300, MHz).

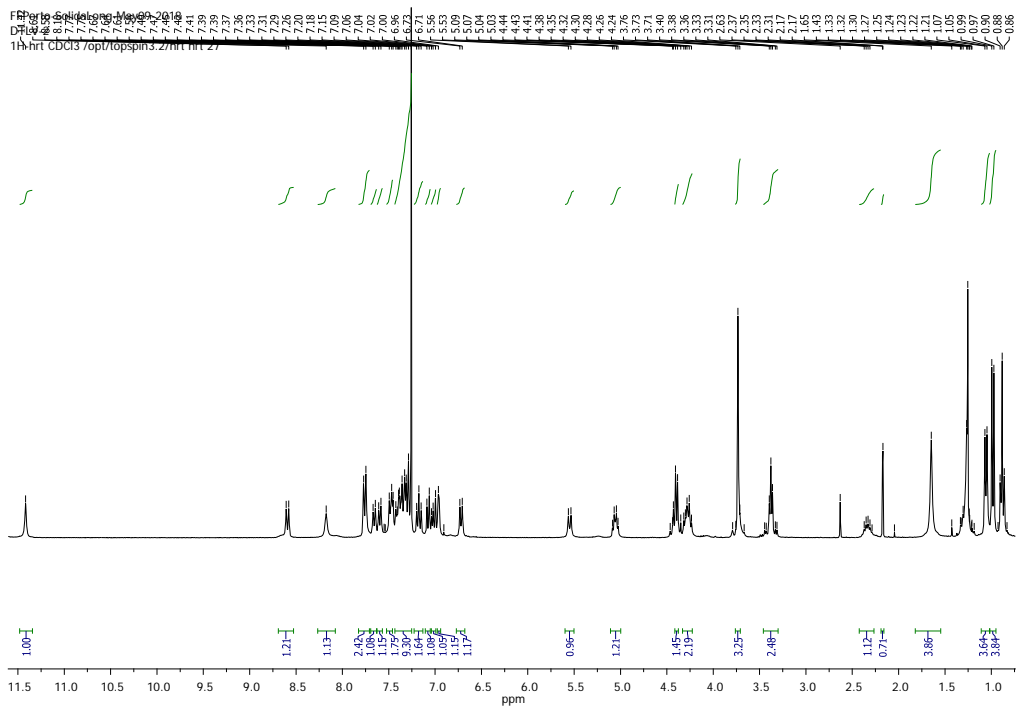

**Figure S21.** <sup>1</sup>H NMR spectrum of *N*-[9*H*-fluoren-9-ylmethoxy)carbonyl]-*D*-valinyl-2-aminobenzoyl-*D*-tryptophan methyl ester (**vi-c**) (CDCl<sub>3</sub>, 300, MHz).

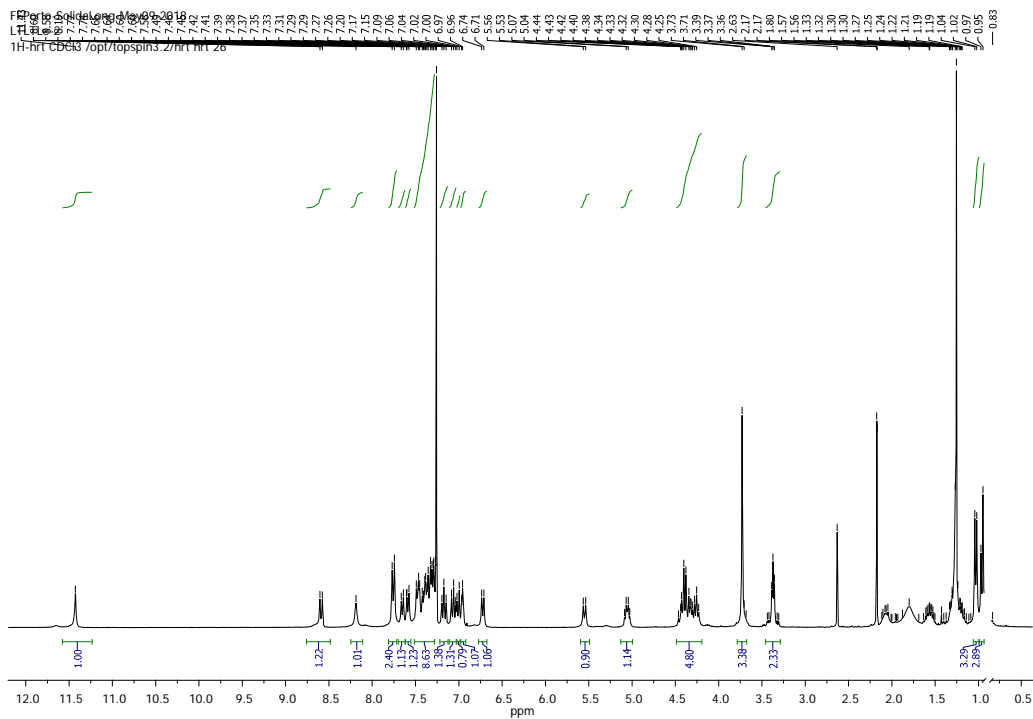

**Figure S22.** <sup>1</sup>H NMR spectrum of *N*-[9*H*-fluoren-9-ylmethoxy)carbonyl]-*D*-methylpentyl-2-aminobenzoyl-*D*-tryptophan methyl ester (**vi-d**) (CDCl<sub>3</sub>, 300, MHz).

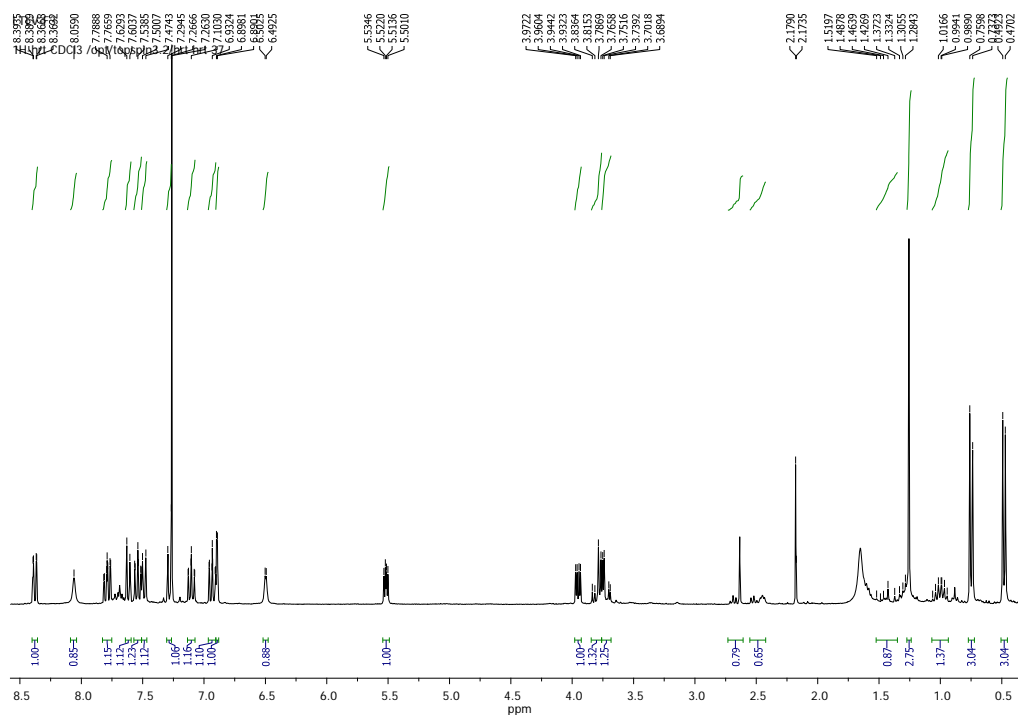

**Figure S23.**  $^1\text{H}$  NMR spectrum of (1*S*,4*S*)-4-(1*H*-indol-3-ylmethyl)-1-isopropyl-2*H*-pyrazino[2,1-*b*]quinazolin-3,6-(1*H*, 4*H*)-dione (**4a**) ( $\text{CDCl}_3$ , 300, MHz).

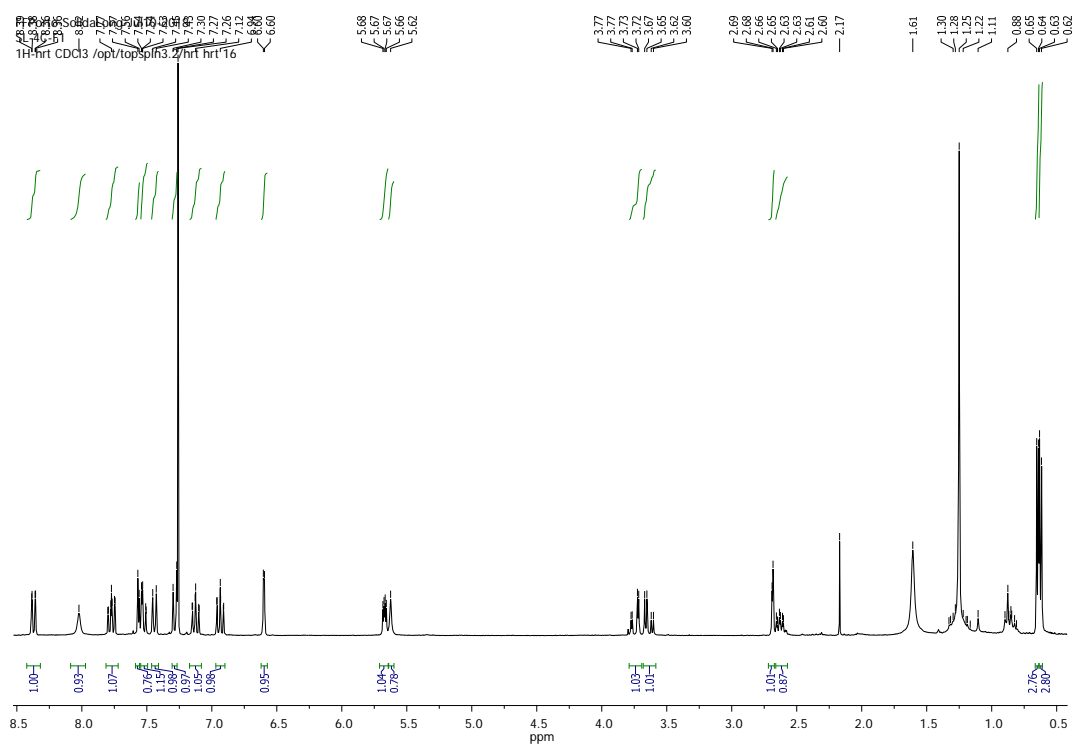

**Figure S24.**  $^1\text{H}$  NMR spectrum of (1*R*,4*S*)-4-(1*H*-Indol-3-ylmethyl)-1-isopropyl-2*H*-pyrazino[2,1-*b*]quinazoline-3,6-(1*H*,4*H*)-dione (**4b**) ( $\text{CDCl}_3$ , 300, MHz).



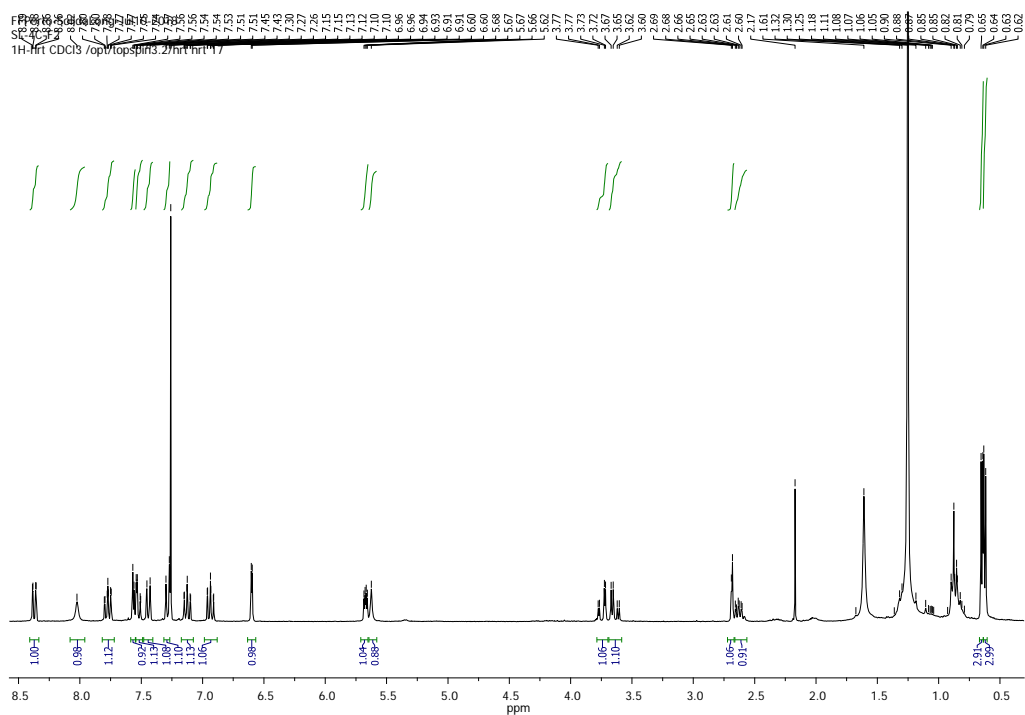

**Figure S25.**  $^1\text{H}$  NMR spectrum of (1*S*,4*R*)-4-(1*H*-Indol-3-ylmethyl)-1-isopropyl-2*H*-pyrazino[2,1-*b*]quinazoline-3,6-(1*H*,4*H*)-dione (**4c**) ( $\text{CDCl}_3$ , 300, MHz).

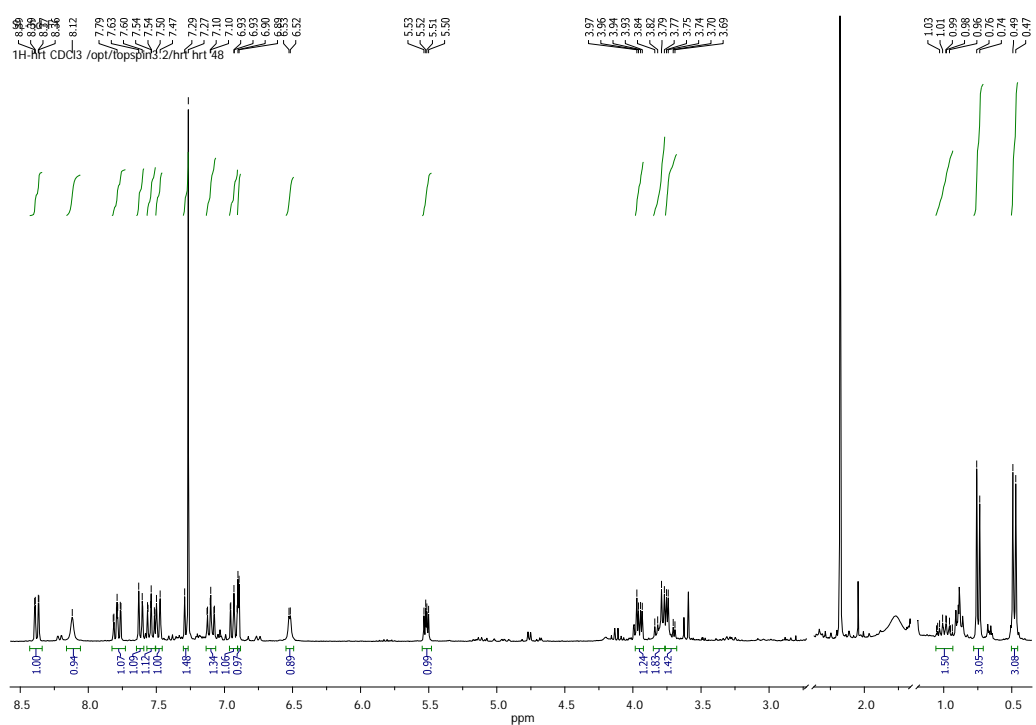

**Figure S26.**  $^1\text{H}$  NMR spectrum of (1*R*,4*R*)-4-(1*H*-indol-3-ylmethyl)-1-isopropyl-2*H*-pyrazino[2,1-*b*]quinazolin-3,6-(1*H*, 4*H*)-dione (**4d**) ( $\text{CDCl}_3$ , 300, MHz).



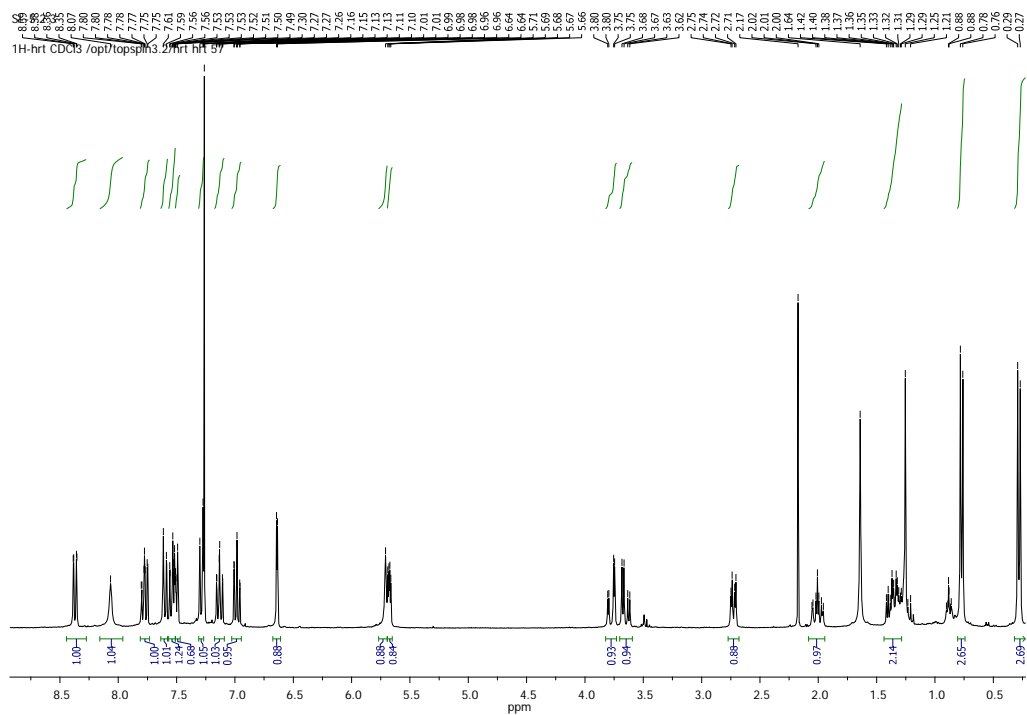

**Figure S29.**  $^1\text{H}$  NMR spectrum of (1*S*,4*R*)-4-(1*H*-Indol-3-ylmethyl)-1-isobutyl-2*H*-pyrazino[2,1-*b*]quinazoline-3,6-(1*H*,4*H*)-dione (**5c**) ( $\text{CDCl}_3$ , 300, MHz).

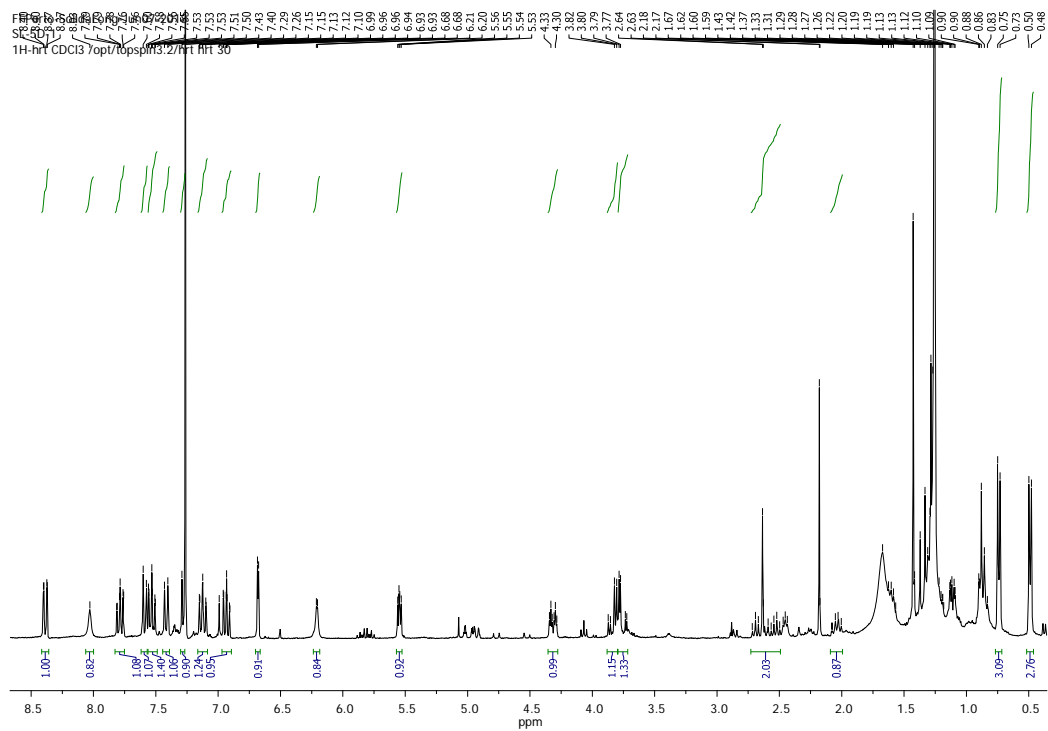

**Figure S30.**  $^1\text{H}$  NMR spectrum of (1*R*,4*R*)-4-(1*H*-indol-3-ylmethyl)-1-isobutyl-2*H*-pyrazino[2,1-*b*]quinazolin-3,6-(1*H*, 4*H*)-dione (**5d**) ( $\text{CDCl}_3$ , 300, MHz).

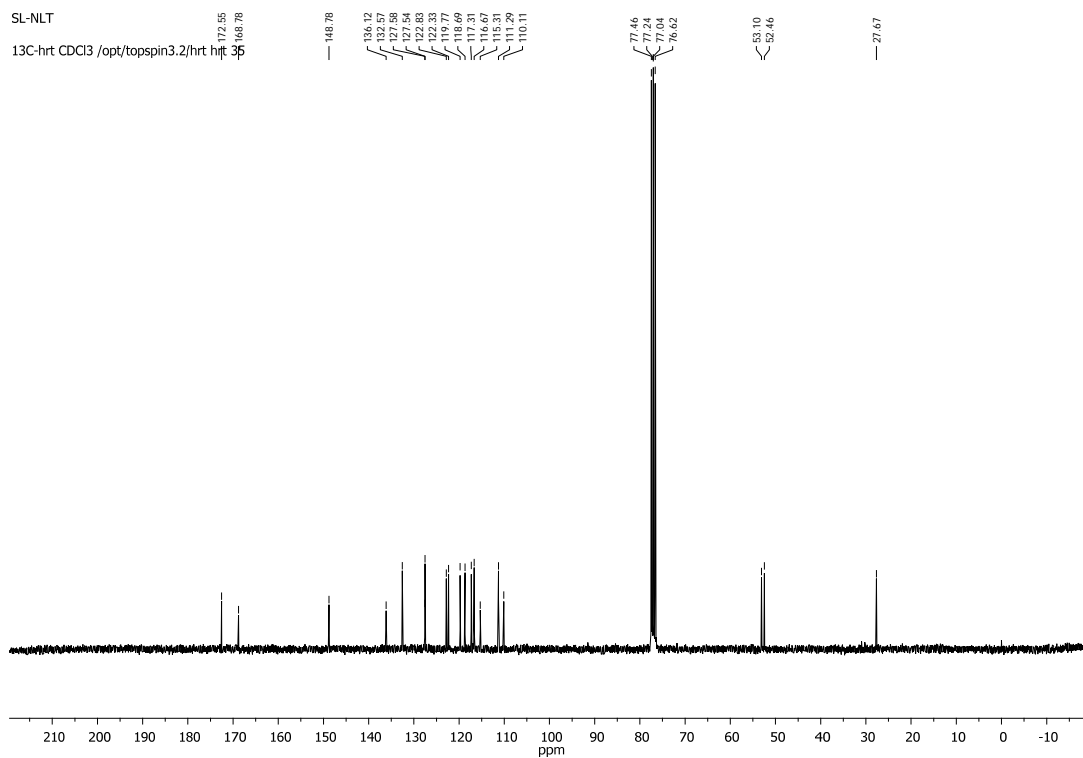

**Figure S31.**  $^{13}\text{C}$  NMR spectrum of *N*-(2-aminobenzoyl)-L-tryptophan methyl ester (**iv-a**) ( $\text{CDCl}_3$ , 75, MHz).

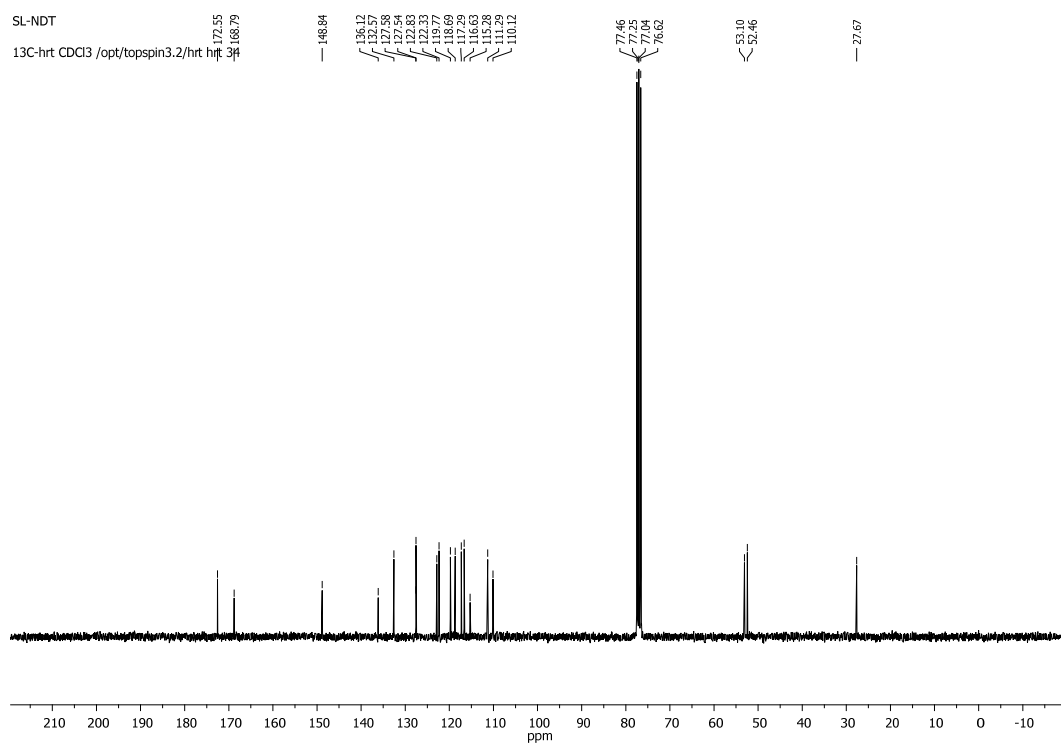

**Figure S32.**  $^{13}\text{C}$  NMR spectrum of *N*-(2-aminobenzoyl)-D-tryptophan methyl ester (**iv-b**) ( $\text{CDCl}_3$ , 75, MHz).

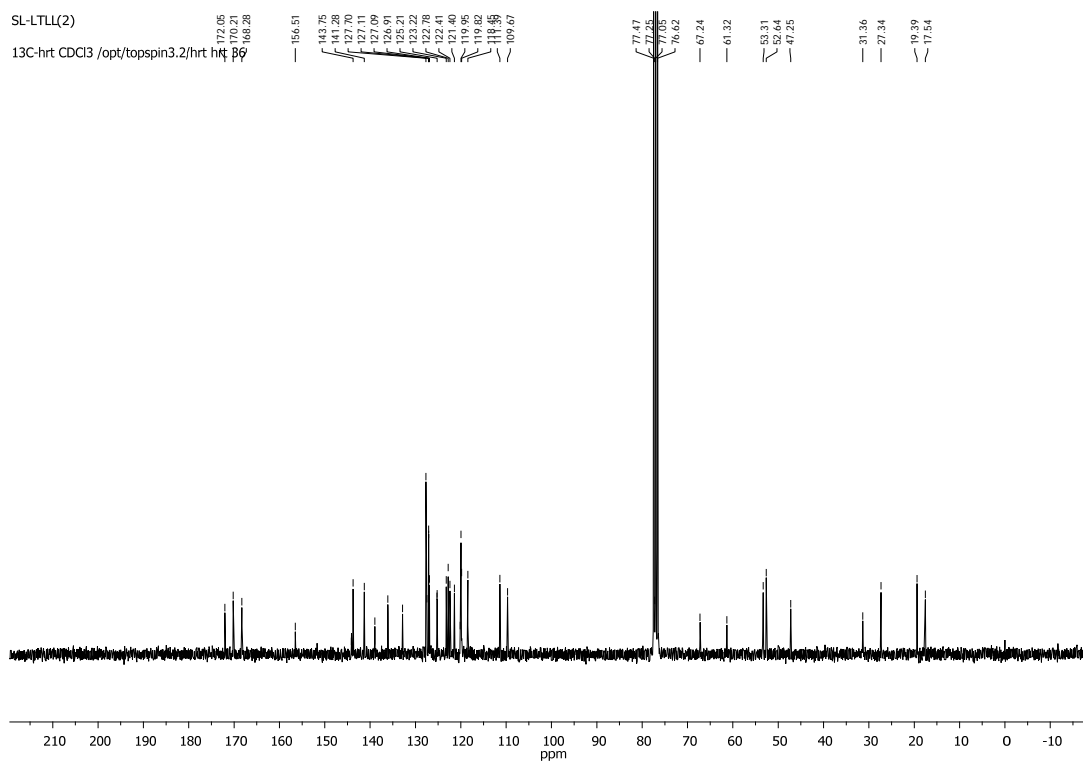

**Figure S33.**  $^{13}\text{C}$  NMR spectrum of *N*-[9*H*-fluoren-9-ylmethoxy)carbonyl]-L-valinyl-2-aminobenzoyl-L-tryptophan methyl ester (**vi-a**) ( $\text{CDCl}_3$ , 75, MHz).

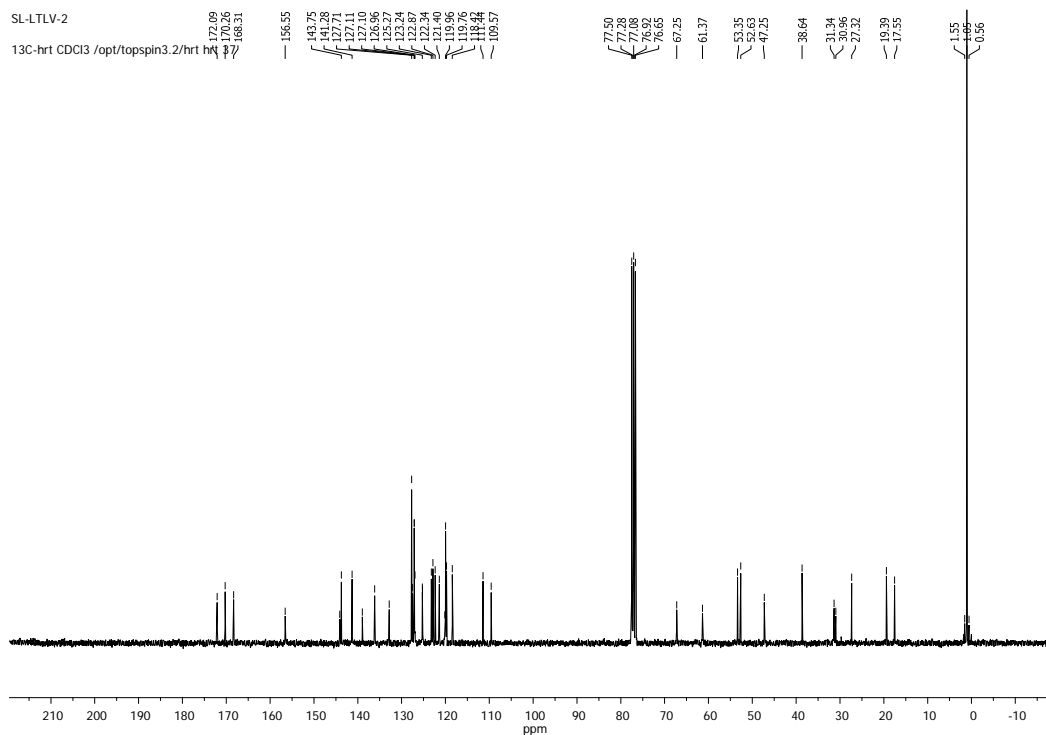

**Figure S34.**  $^{13}\text{C}$  NMR spectrum of *N*-[9*H*-fluoren-9-ylmethoxy)carbonyl]-*L*-methylpentanyl-2*H*-aminobenzoyl-*L*-tryptophan methyl ester (**vi-b**) ( $\text{CDCl}_3$ , 75, MHz).

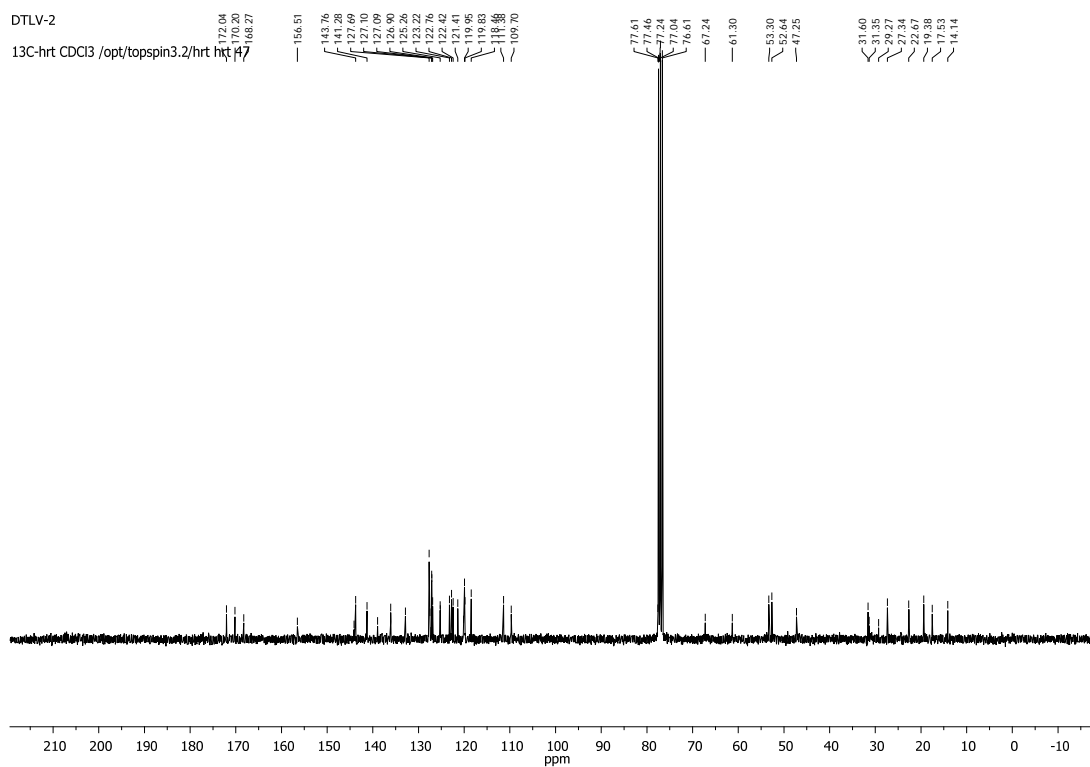

**Figure S35.**  $^{13}\text{C}$  NMR spectrum of *N*-[9*H*-fluoren-9-ylmethoxy]carbonyl]-*D*-valinyl-2-aminobenzoyl-*D*-tryptophan methyl ester (**vi-c**) ( $\text{CDCl}_3$ , 75, MHz).

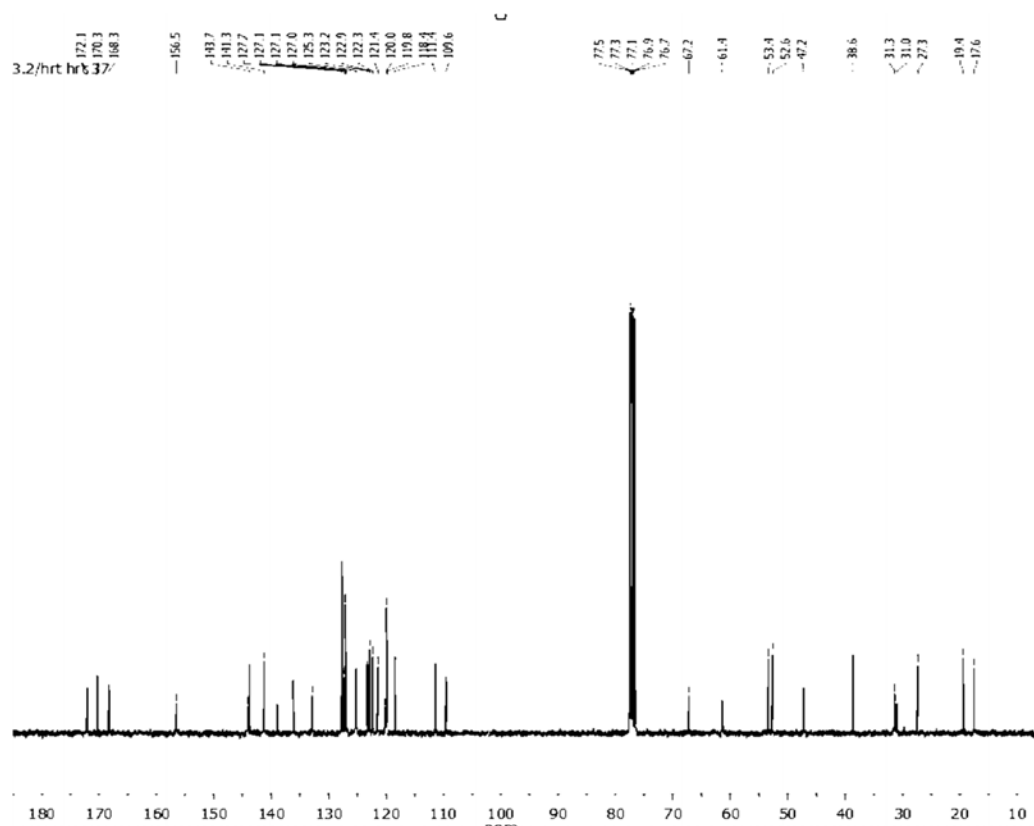

**Figure S36.**  $^{13}\text{C}$  NMR spectrum of *N*-[9*H*-fluoren-9-ylmethoxy]carbonyl]-*D*-methylpentyl-2-aminobenzoyl-*D*-tryptophan methyl ester (**vi-d**) ( $\text{CDCl}_3$ , 75, MHz).

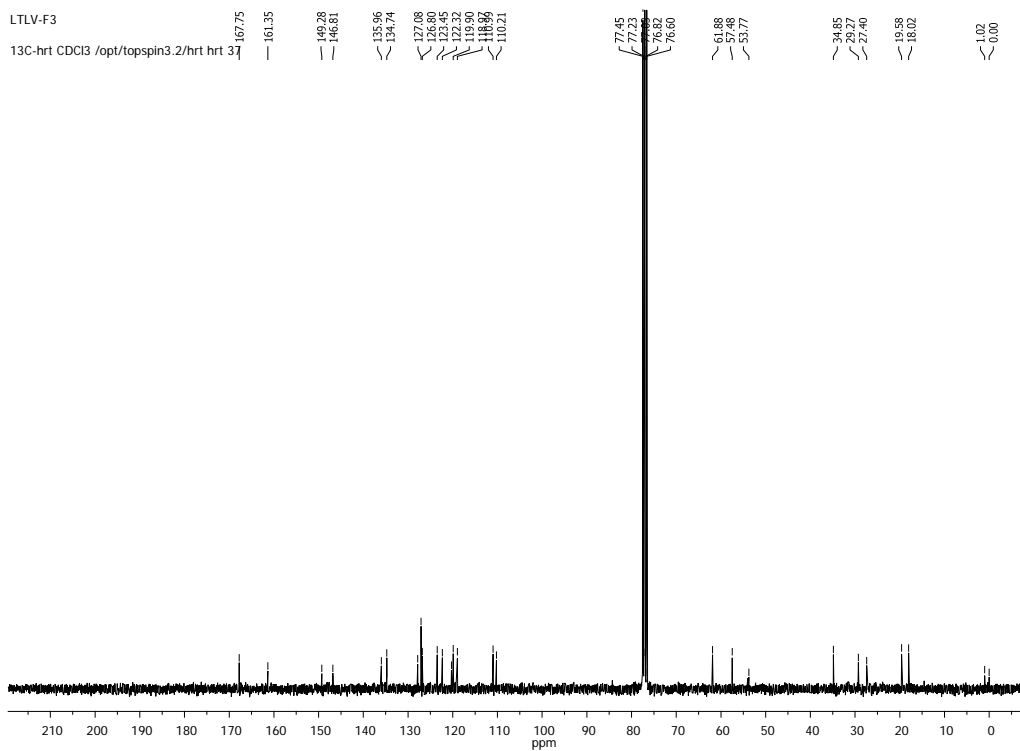

**Figure S37.**  $^{13}\text{C}$  NMR spectrum of (1*S*,4*S*)-4-(1*H*-indol-3-ylmethyl)-1-isopropyl-2*H*-pyrazino[2,1-*b*]quinazolin-3,6-(1*H*, 4*H*)-dione (**4a**) ( $\text{CDCl}_3$ , 75, MHz).

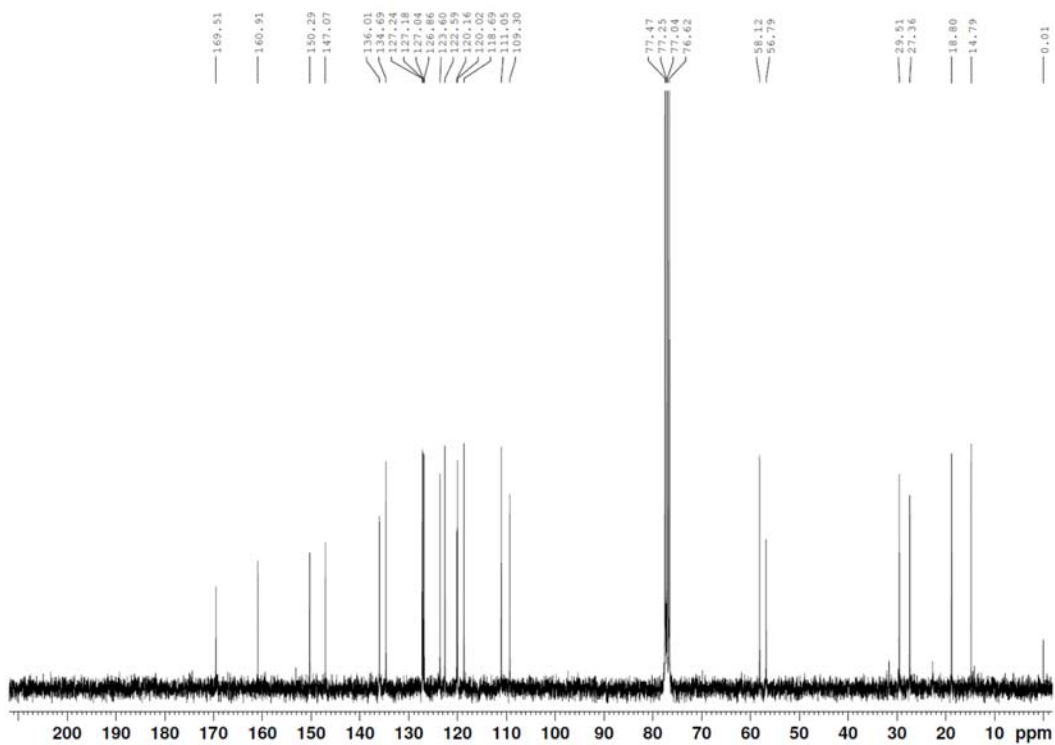

**Figure S38.**  $^{13}\text{C}$  NMR spectrum of (1*R*,4*S*)-4-(1*H*-Indol-3-ylmethyl)-1-isopropyl-2*H*-pyrazino[2,1-*b*]quinazoline-3,6-(1*H*,4*H*)-dione (**4b**) ( $\text{CDCl}_3$ , 75, MHz).



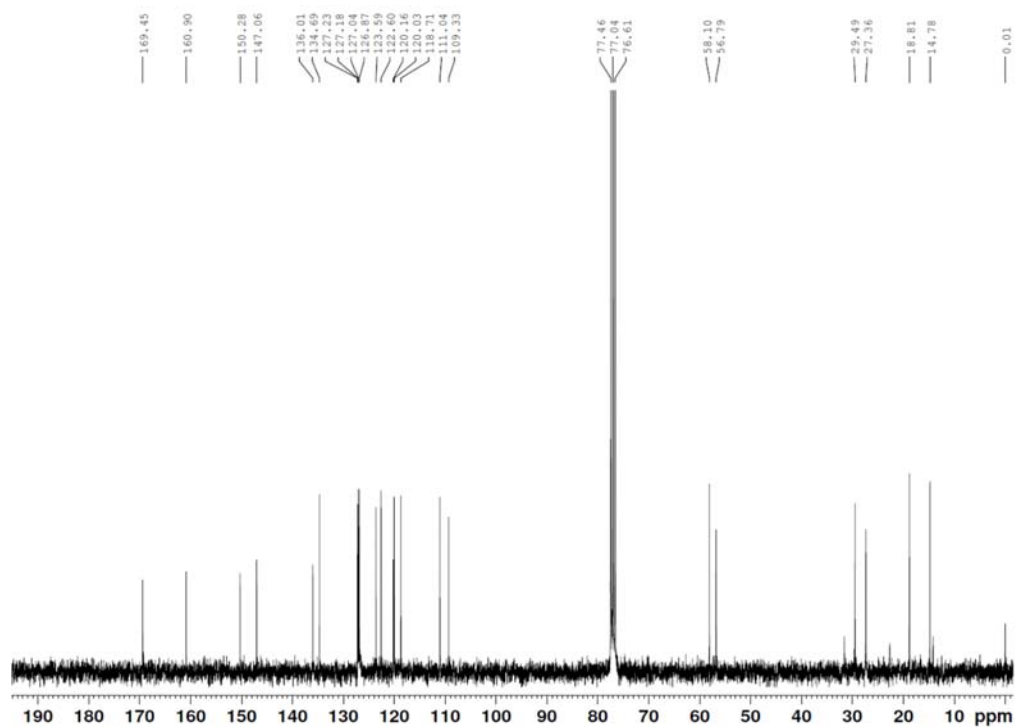

**Figure S39.**  $^{13}\text{C}$  NMR spectrum of (1*S*,4*R*)-4-(1*H*-Indol-3-ylmethyl)-1-isopropyl-2*H*-pyrazino[2,1-*b*]quinazoline-3,6-(1*H*,4*H*)-dione (**4c**) ( $\text{CDCl}_3$ , 75, MHz).

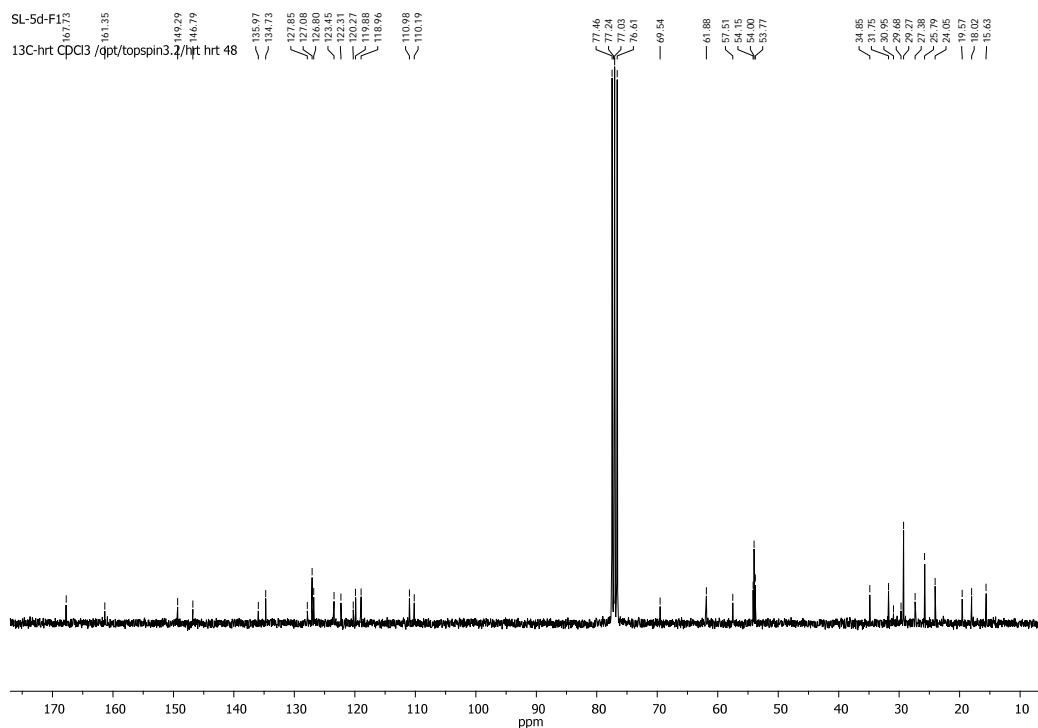

**Figure S40.**  $^{13}\text{C}$  NMR spectrum of (1*R*,4*R*)-4-(1*H*-indol-3-ylmethyl)-1-isopropyl-2*H*-pyrazino[2,1-*b*]quinazolin-3,6-(1*H*, 4*H*)-dione (**4d**) ( $\text{CDCl}_3$ , 75, MHz).

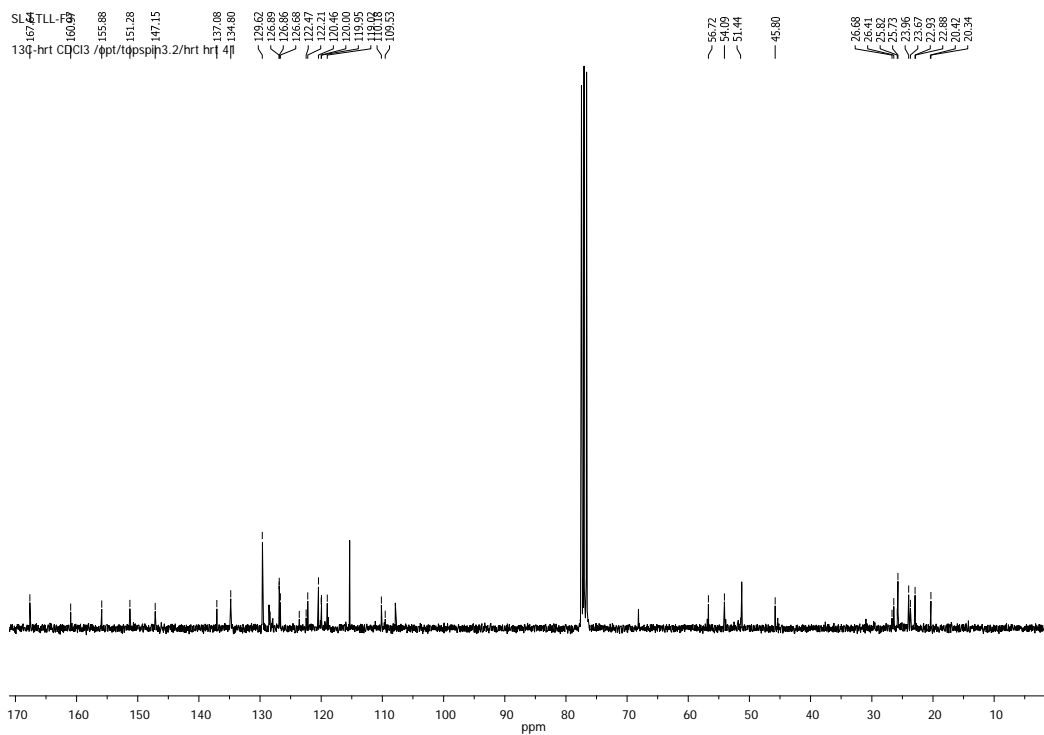

**Figure S41.**  $^{13}\text{C}$  NMR spectrum of (1*S*,4*S*)-4-(1*H*-indol-3-ylmethyl)-1-isobutyl-2*H*-pyrazino[2,1-*b*]quinazolin-3,6-(1*H*, 4*H*)-dione (**5a**) ( $\text{CDCl}_3$ , 75, MHz).

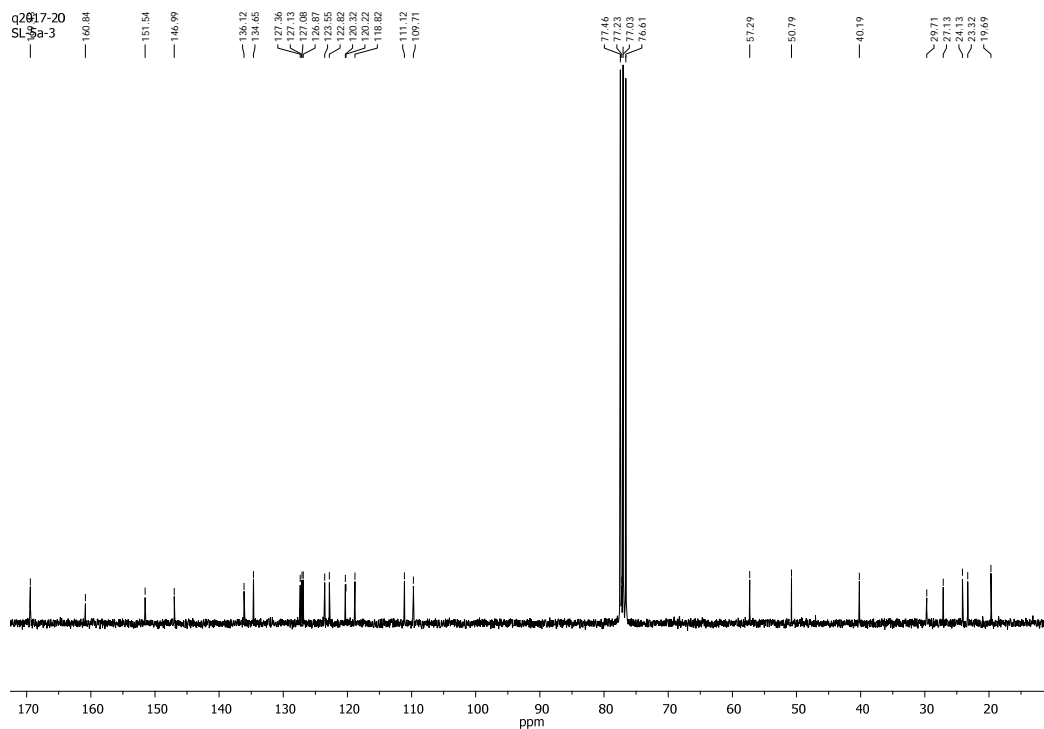

**Figure S42.**  $^{13}\text{C}$  NMR spectrum of (1*R*,4*S*)-4-(1*H*-Indol-3-ylmethyl)-1-isobutyl-2*H*-pyrazino[2,1-*b*]quinazolin-3,6-(1*H*,4*H*)-dione (**5b**) ( $\text{CDCl}_3$ , 75, MHz)

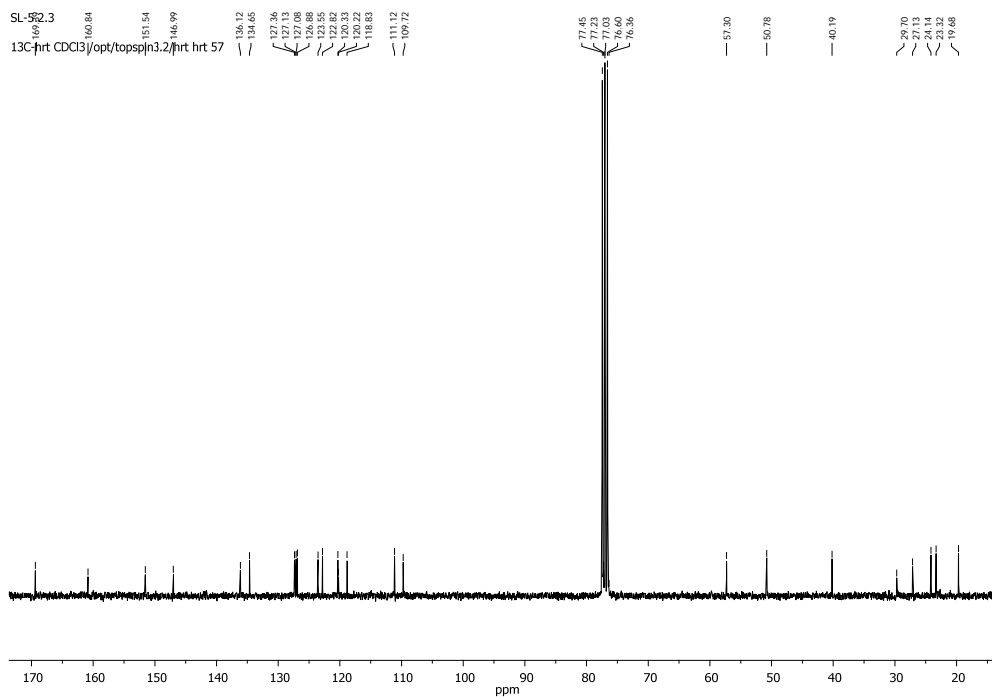

**Figure S43.**  $^{13}\text{C}$  NMR spectrum of (1*S*,4*R*)-4-(1*H*-Indol-3-ylmethyl)-1-isobutyl-2*H*-pyrazino[2,1-*b*]quinazoline-3,6-(1*H*,4*H*)-dione (**5c**) ( $\text{CDCl}_3$ , 75, MHz).

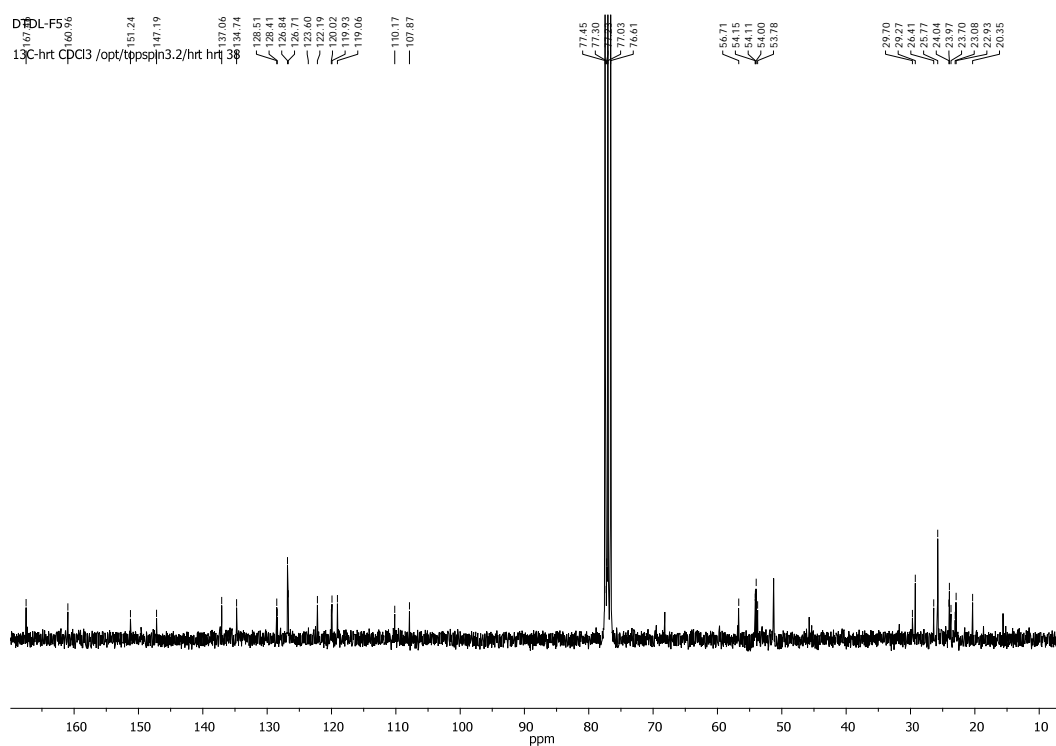

**Figure S44.**  $^{13}\text{C}$  NMR spectrum of (1*R*,4*R*)-4-(1*H*-indol-3-ylmethyl)-1-isobutyl-2*H*-pyrazino[2,1-*b*]quinazolin-3,6-(1*H*, 4*H*)-dione (**5d**) ( $\text{CDCl}_3$ , 75, MHz).

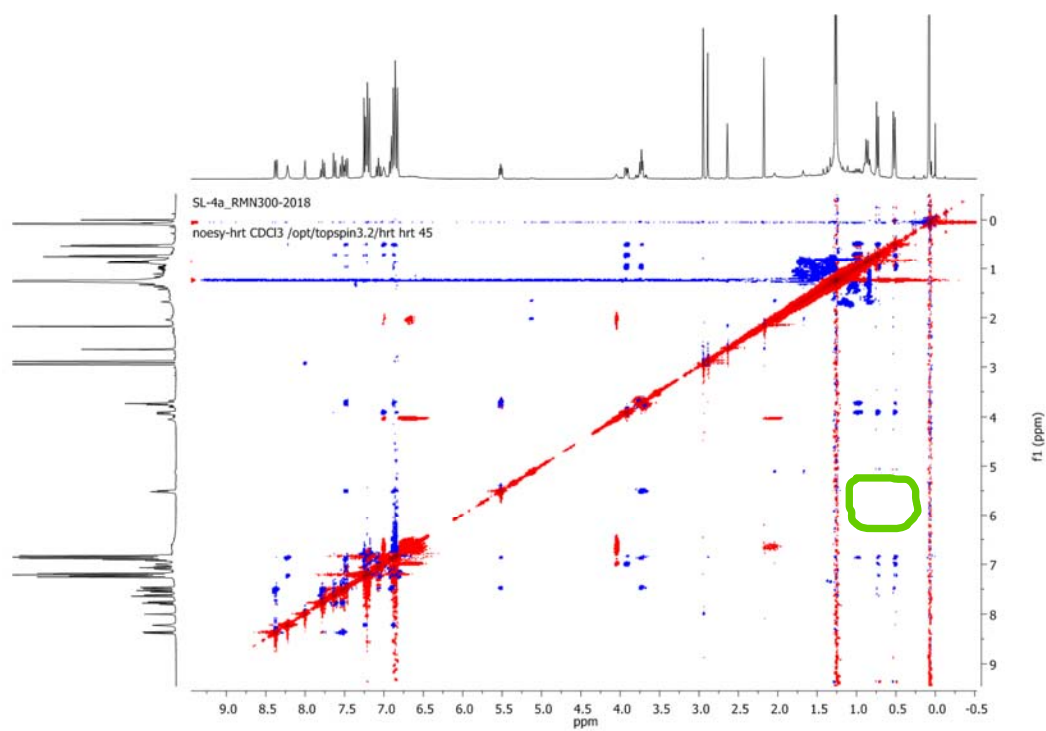

**Figure S45.** NOESY spectrum of (1*S*,4*R*)-4-(1*H*-Indol-3-ylmethyl)-1-isopropyl-2*H*-pyrazino[2,1-*b*]quinazoline-3,6-(1*H*,4*H*)-dione (**4c**) (CDCl<sub>3</sub>, 300, MHz). The green circle represents no correlation of proton of C-1' methyl group and H-4.

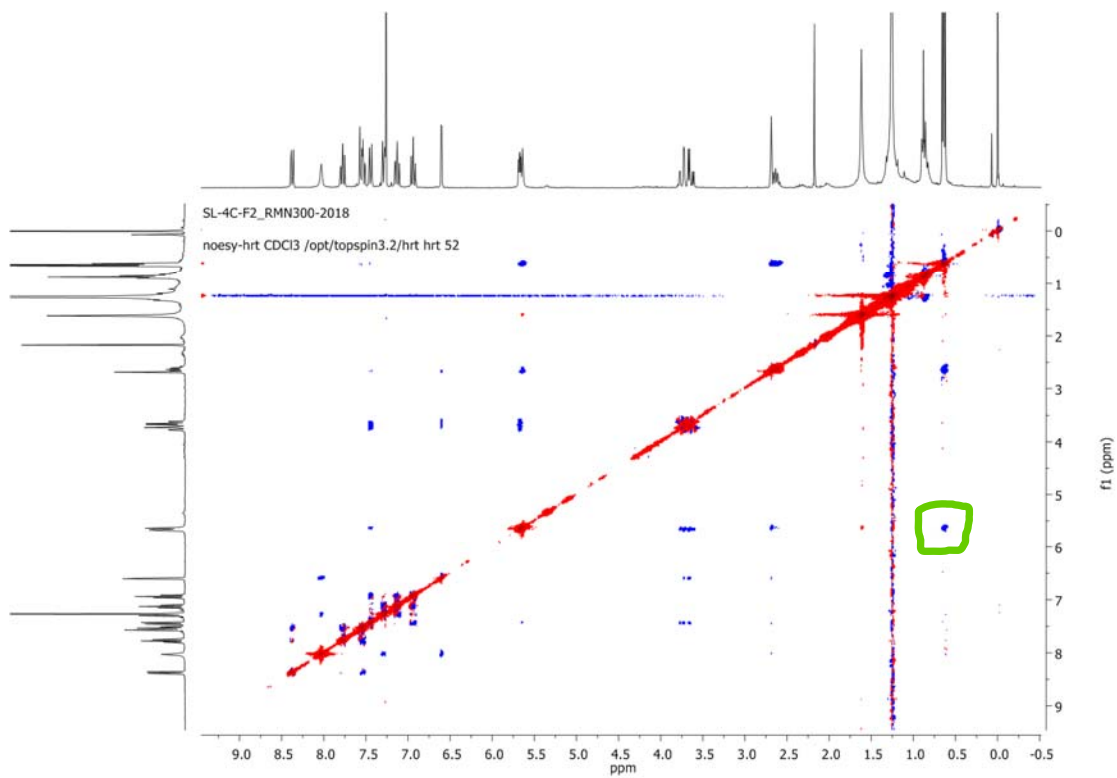

**Figure S46.** NOESY spectrum of (1*S*,4*S*)-4-(1*H*-Indol-3-ylmethyl)-1-isopropyl-2*H*-pyrazino[2,1-*b*]quinazoline-3,6-(1*H*,4*H*)-dione (**4a**) (CDCl<sub>3</sub>, 300, MHz). The green circle represents the correlation of proton of C-1' methyl group and H-4
